# Vector bionomics and vectorial capacity as emergent properties of mosquito behaviors and ecology

Sean L. Wu<sup>1</sup>, Hector M. Sanchez C.<sup>1,2</sup>, John M. Henry<sup>3</sup>, Daniel T. Citron<sup>3</sup>, Qian Zhang<sup>3</sup>, Kelly Compton<sup>3</sup>, Biyonka Liang<sup>1</sup>, Amit Verma<sup>4</sup>, Derek A.T. Cummings<sup>5</sup>, Arnaud Le Menach<sup>6</sup>, Thomas W. Scott<sup>7</sup>, Anne L. Wilson<sup>8</sup>, Steven W. Lindsay<sup>9</sup>, Catherine L. Moyes<sup>10</sup>, Penny A. Hancock<sup>10</sup>, Tanya L. Russell<sup>11</sup>, Thomas R. Burkot<sup>11</sup>, John M. Marshall<sup>1</sup>, Samson Kiware<sup>12</sup>, Robert C. Reiner Jr.<sup>3,13</sup>, and David L. Smith<sup>3,13,\*</sup>

<sup>1</sup>*Divisions of Biostatistics & Epidemiology, University of California, Berkeley, Berkeley, California, USA*

<sup>2</sup>*Instituto Tecnológico y de Estudios Superiores de Monterrey, Monterrey, Mexico*

<sup>3</sup>*Institute for Health Metrics and Evaluation, University of Washington, Seattle, Washington, USA*

<sup>4</sup>*Emory University, Atlanta, Georgia, USA*

<sup>5</sup>*Department of Biology, University of Florida, Gainesville, Florida, USA*

<sup>6</sup>*Clinton Health Access Initiative, Boston, Massachusetts, USA*

<sup>7</sup>*University of California, Davis, California, USA*

<sup>8</sup>*Liverpool School of Tropical Tropical Medicine, Liverpool, UK*

<sup>9</sup>*Department of Biosciences, University of Durham, Durham, UK*

<sup>10</sup>*Big Data Institute, University of Oxford, Oxford, UK*

<sup>11</sup>*Australian Institute of Tropical Health and Medicine, James Cook University, Cairns, Australia*

<sup>12</sup>*Ifakara Health Institute, Environmental Health and Ecological Sciences Thematic Group, Ifakara, Tanzania*

<sup>13</sup>*Department of Health Metrics Sciences, School of Medicine, University of Washington, Seattle, Washington, USA*

\* *Corresponding author: [smitdave@uw.edu](mailto:smitdave@uw.edu)*

## Abstract

Mosquitoes are important vectors for pathogens of humans and other vertebrate animals. Some aspects of adult mosquito behavior and mosquito ecology play an important role in determining the capacity of vector populations to transmit pathogens. Here, we re-examine factors affecting the transmission of pathogens by mosquitoes using a new approach. Unlike most previous models, this framework considers the behavioral states and state transitions of adult mosquitoes through a sequence of activity bouts. We developed a new framework for individual-based simulation models called MBITES (Mosquito Bout-based and Individual-based Transmission Ecology Simulator). In MBITES, it is possible to build models that simulate the behavior and ecology of adult mosquitoes in exquisite detail on complex resource landscapes generated by spatial point processes. We also developed an ordinary differential equation model which is the Kolmogorov forward equations for models developed in MBITES under a specific set of simplifying assumptions. While infection of the mosquito and pathogen development are one possible part of a mosquito's state, that is not the main focus. Using extensive simulation using some models developed in MBITES, we show that vectorial capacity can be understood as an emergent property of simple behavioral algorithms interacting with complex resource landscapes, and that relative density or sparsity of resources and the need to search can have profound consequences for mosquito populations' capacity to transmit pathogens.

# 1 Background & Introduction

Mosquitoes transmit the pathogens that cause malaria, filariasis, dengue, and other diseases that account for approximately 17% of the global burden of infectious diseases [1]. Mosquito-borne pathogens are transmitted while mosquitoes probe or blood feed, so the intensity of transmission and the risk of infection are related to blood feeding behaviors and population density of local populations of vector mosquitoes. Development of concepts and metrics to measure transmission intensity by mosquitoes, such as the entomological inoculation rate (EIR) and vectorial capacity (VC), were motivated by or derived from mathematical models of mosquito-borne transmission [2–6]. Entomologists meanwhile identified and developed field methods to measure some of the parameters that are key determinants of the EIR and VC: mosquito survival, mosquito population density, the overall blood feeding frequency, and human blood index, the ratio of mosquitoes to humans in the area, and the pathogen’s extrinsic incubation period (EIP) [7,8]. These parameters are also important determinants of vector population responses to vector control interventions, such as insecticide-treated nets, indoor residual spraying, and spatial repellents, to name but a few. These parameters and metrics arise from basic mosquito behavioral algorithms for finding and using resources, avoiding hazards, and adjusting to weather and other factors that characterize mosquito ecology [9,10]. An important question is how parameters relevant for pathogen transmission and vector control are co-determined by basic behavioral algorithms and genetically determined preferences of each vector species and by the availability and distribution of resources and other ecological factors.

The canonical model of the entomological aspects of malaria transmission, called the Ross-Macdonald model, describes changes in the sporozoite rate [4]. The associated formulae for VC and the EIR, which arise from a common conceptual and mathematical basis, summarize transmission intensity in terms of a few parameters (Table 1) [6,11]. Both formulae count the expected number of events occurring on one human on one day: VC measures the number of infectious bites that would arise from all mosquitoes blood feeding on a typical human, as if that human were perfectly infectious; and the daily EIR measures the number of infectious bites received by a typical human. The number of bites arising must approximately balance the number of bites received, after accounting for time lags (e.g. the EIP), mosquito migration, and imperfect transmission from infected humans. Mathematical formulas for VC and the EIR derived *a priori* are consequently related by a simple formula [12]. The quantitative logic supporting these metrics is both parsimonious and compelling, and these metrics and associated bionomic parameters form the basis of medical entomology and most models of mosquito-borne pathogen transmission [13].

While the Ross-Macdonald model and associated bionomic parameters are a useful way of summarizing

overall transmission intensity, a weakness of the model is that it does not include many other parameters and metrics that are important for pathogen transmission dynamics, the measurement of transmission, and responses to vector control. These include metrics for heterogeneous biting [14], the spatial dimensions of transmission or control [15–17], contact rates with and quantitative responses to various kinds of vector control deployed in myriad combinations and at various coverage levels [18], environmental factors that affect variance in the number of mosquitoes caught [19], and nuances of behavior affecting the accuracy of various field methods [8]. Models describing effect sizes of vector control rely on assumptions about the way interventions alter the basic bionomic parameters [20], but there has been very little theory developed to understand either what contextual factors determine baseline bionomic parameters or how contextual factors influence the effect sizes of control [21]. What is needed is a synthetic framework for weighing heterogeneity: spatial and temporal heterogeneity in the availability of hosts and the rates of blood feeding on humans; heterogeneity in the availability of habitats, egg laying, and mosquito population dynamics; age-specific mosquito mortality; mating and the availability of mates; energetics, sugar feeding and the availability of sugar sources; and the risks and costs associated with searching for all these resources. Understanding and quantifying the inter-dependency of mosquito behavior on hazards and resources through observation presents enormous challenges.

One way to forge a new synthesis is to model mosquito behavior at its most irreducible level and in extreme detail; here we present a new framework for building individual-based models based on the concept of an “activity bout”. A bout is initiated when a mosquito launches itself in the air to do something and ends after a mosquito has landed, rested, and is about to launch itself into the air again. It includes a sequence of events which may be of varying duration depending on factors both internal and external to the mosquito. In the models we present here, the bout is the atomic unit of mosquito activities, and it is linked to the conception of a behavioral state space, which is affected by the mosquito’s current physiological state. This behavioral state depends on cues about the local ecology and past events that determine what activity the mosquito is intent on accomplishing at any given time, such as seeking to blood feed or oviposit. Success and survival through each bout depend on context and chance; probabilities are affected by the resources and hazards in its vicinity, the cues it uses to find those resources, its efficiency in using those resources, and other factors such as vector interventions that kill mosquitoes or alter their behavior to suppress transmission. From a basic description of mosquito behavioral states, it is clear that mosquito activity and behavioral state transitions depend not only on the mosquito’s biology, but also on the distribution of nearby blood hosts and other resources, as well as elements of local ecology and vector control.

To understand how ecology and behavior jointly affect transmission, we developed behavioral state

models for mosquitoes to show how the values of bionomic parameters in the Ross-Macdonald model arise from basic mosquito behavioral algorithms in response to ecology. These models consider a behavioral state space and model the dynamic transitions between states as they follow the biological imperatives of their state and succeed or fail depending on the availability of local resources and other factors. MBITES (Mosquito Bout-based and Individual-based Transmission Ecology Simulator) is a framework for building individual-based simulation models of mosquito behavioral activity bouts in exquisite detail. Simulated mosquito activities are implemented as algorithms executing atomic bouts and behavioral transitions in response to resources that are organized on spatially explicit landscapes. MBDETES (Mosquito Bout-based Differential Equation-based Transmission Ecology Simulator) is a differential equation based model of behavioral state transitions. MBDETES is more analytically tractable than MBITES. Under a restricted set of assumptions, some MBITES models can be represented as a continuous-time Markov process, for which MBDETES is the set of master equations. Since MBDETES describes the expected behavior of some MBITES models, we use the two frameworks for mutual verification through both simulation and analysis.

These two bout-based behavioral state models make it possible to investigate how behavioral algorithms and resource distributions affect local decisions and give rise to the parameters that are widely acknowledged to be important for pathogen transmission. Through Monte Carlo simulation of models developed in MBITES, it is possible to compute any quantity describing adult mosquito reproductive success or capability to act as effective pathogen vectors and, through careful *in silico* analysis, to learn what factors determine their values. To this end, MBITES provides algorithms to compute from simulation output: lifespans, metrics of mosquito dispersal from the natal aquatic habitat, number of lifetime blood hosts (stability index), the length of a feeding cycle, survival through one feeding cycle, blood feeding rate, entomological inoculation rate (EIR), egg production & dispersal, vectorial capacity (VC), and the spatial scales over which VC is dispersed. By summarizing models according to these values, we can map these behavioral models to regularly discussed and estimated metrics that are the target of inference and control in many intervention studies. We show how the classical mosquito bionomic parameters used by the Ross-Macdonald model arise from mosquito behavioral algorithms in their ecological context, but we also describe their distribution and spatial dimensions. These behavioral state models thus provide a way of synthesizing more than a century of studies that have observed and measured aspects of individual mosquito behavior in a variety of contexts, from laboratory through the field.

## 2 MBITES

116

MBITES is a framework for building individual-based simulation models for adult mosquito behavior and ecology; for each mosquito, MBITES samples events and outputs a lifetime trajectory through behavioral state space as well as spatial location. The framework accommodates differences in behavioral algorithms and life-history traits across species, different ecological contexts, and different purposes. To make it useful as a research tool, some pre-defined behavioral states are optional. An important feature of MBITES is a resource landscape can be configured to suit any situation. MBITES has a modular design: several functions can be called to model each biological or ecological process, and it is comparatively easy to add, remove or modify new functions or features. Mathematical and computational details, including functional forms and some options are documented in the code.

117

118

119

120

121

122

123

124

125

MBITES is under active development and it is being maintained with version control. This document describes MBITES version 1.0. The code was written in R and C [22]. Source code for MBITES are released at a permanent GitHub archive (<https://github.com/dd-harp/MBITES/tree/v1.0/MBITES>); configuration files for simulations in this paper have been archived at a separate GitHub archive (<https://github.com/dd-harp/MBITES/tree/v1.0/scripts>).

126

127

128

129

130

### 2.1 The Landscape

131

MBITES simulates mosquito behavior on a set of points in space called *haunts*, small areas where mosquitoes can rest between long range search flights. *Resources* may be present at some of these haunts. Landing spots within a *haunt* are represented as a set of micro-sites. The set of points and associated resources is called the *landscape*.

132

133

134

135

Each adult mosquito emerges from one of these haunts and moves among the haunts throughout its life as it searches for and utilizes the resources it needs. In this manuscript we consider only two types of resources. First, blood feeding haunts are places where vertebrate animals are typically found such that mosquitoes could take a blood meal, which could include the area around a family dwelling or other structure, a field where farming occurs, or an outdoor spot where humans or other vertebrate animals are found. Second, some haunts include aquatic *habitats* where mosquitoes attempt to lay eggs. In this manuscript we do not consider density-dependent dynamics in aquatic habitats, as our focus is on the behavioral algorithms that structure how cohorts of mosquitoes behave after emergence. We acknowledge the possibility and importance of nonlinear dependence in adult mosquito behaviors, such as the choice of where to oviposit, and competition for resources by larval mosquitoes in aquatic habitats.

136

137

138

139

140

141

142

143

144

145

However, we feel confident in presenting the current set of *adult* behavioral algorithms as an initial step, 146  
to be followed up with development of detailed *aquatic* algorithms which will incorporate such dynamics; 147  
the modular design patterns we have used in MBITES allows for such development to be feasible and 148  
transparent. 149

Two other types of resources included in MBITES, which will be described in detail in future 150  
manuscripts, are sugar sources and mating sites. Each haunt may have one or more resource type and 151  
more than one of each type of resource; more than one potential blood host could be present, and there 152  
could be more than one suitable aquatic habitat, such as a pond and a rain-storage barrel in the 153  
backyard of a home, for instance. The question of how to model a landscape – how many haunts make 154  
up the landscape, how large an area is represented by each haunt, whether to include haunts without 155  
other resources, and how many micro-sites in each haunt – is flexible. In some instances, a haunt could 156  
represent a small area around a habitat or the area immediately surrounding a single household. The 157  
question is intrinsically related to mosquito search and dispersal, a question that may require some 158  
tuning, depending on the purpose of a simulation. 159

In addition to the resources present, each haunt is assigned a set of *local hazards*, or parameters that 160  
affect survival at the site, which reflects highly local conditions (such as predators) that may make a 161  
haunt more or less dangerous than others of the same type. 162

Each haunt is characterized by a set of micro-sites, which define specific aspects of the places within a 163  
haunt where the mosquito lands to rest. Different *types* of haunts may have different sets of micro-sites 164  
with different resting surfaces. A *homestead* is a pre-defined haunt type with three micro-sites” a 165  
mosquito may rest either in the house, or outside on the house, or outside on surrounding vegetation. If 166  
there is no human dwelling at a haunt, it could have only vegetation. Other types can be easily 167  
constructed (*e.g.*, a homestead with livestock sheds) with their own set of relevant micro-sites for 168  
resting. 169

These micro-sites were devised to simulate survival through the post-prandial resting period or contact 170  
with various kinds of vector control in a highly realistic way, including exposure to residual pesticides 171  
and house entering. Housing quality and housing improvements can affect the probability of entering a 172  
house; when a mosquito attempts to enter a house, it may encounter an eave tube; insecticide spraying 173  
can be applied to the interior walls of houses (or not), their exterior walls (or not), or vegetation (or not) 174  
so that contact is simulated only if a mosquito lands on the type of micro-site that has been sprayed; and 175  
area repellents or other local features can make it more likely a mosquito will leave the haunt, thereby 176  
initiating a new search bout. Encounter with environmental vector based intervention, such as indoor 177  
residual spraying (excluding personal-level interventions, such as topical repellents, which we considered 178

separately) at any point may incur death or physiological damage. 179

**Modular Design** MBITES is designed to be nested within a broader framework for simulating the 180  
transmission dynamics and control of mosquito-borne pathogens. Because agents in MBITES interact on 181  
the landscape, it is necessary in the simulation for haunts to have associated data structures that record 182  
information to pass between different parts of the model. For example, when a human visits a certain 183  
blood feeding haunt, they must leave a piece of information denoting their id, when they arrived, and the 184  
duration of their stay so that during the mosquito portion of the MBITES simulation, mosquitoes 185  
visiting that haunt have a list of potential blood hosts they can select from to take a blood meal. We call 186  
these data structures *queues*, and, more abstractly, they allow different modules to interact in a generic 187  
way, facilitating a design that is both flexible and extensible. To continue the blood feeding example, it 188  
is not important for MBITES to know the specific algorithms by which human movement between blood 189  
feeding haunts is simulated, as long as when a mosquito arrives at a haunt to take a blood meal, it can 190  
query the queue there to find out which blood hosts are available. In many cases the actual 191  
implementation of the queue is quite simple, the queue of blood hosts, for example, only requires a 192  
simple vector type of data structure. 193

As described, at each blood feeding haunt, MBITES tracks all available blood meal hosts in a queue 194  
called the *atRiskQ*. Because not all hosts present at a haunt are equally available or attractive to the 195  
mosquito, the *atRiskQ* stores not only the identities of blood hosts but also a biting weight for each 196  
human and other potential blood host. These biting weights reflect a combination of time spent and 197  
comparative attractiveness of all the hosts. When a mosquito chooses a blood host, she samples from the 198  
discrete distribution on blood hosts parameterized by those biting weights. 199

Each haunt also has a queue object called the *eggQ* that lists aquatic habitats at the haunt and ovitraps. 200  
The *eggQ* stores any eggs laid by mosquitoes for potential use by linked models of immature mosquito 201  
population dynamics in aquatic habitats. Like potential blood hosts, these habitats are not equally 202  
available or attractive to the mosquito, so each *eggQ* has a search weight. These weights can be changed 203  
dynamically to mimic specific behaviors; for example, it is possible to change the search weight if larvae 204  
are present [23]. 205

A landscape is thus comprised of the locations of multiple points in space called haunts where 206  
mosquitoes rest, their resources, a set of micro-sites describing landing behavior (*e.g.*, homestead, shed, 207  
field, forest edge), local hazards, and queues. Importantly, the ability to characterize landing spots in 208  
varying granular levels of detail allows for specific simulations that can adapt to levels of detail present 209  
in field data. In this way, complex composite types of haunts can be built up by adding the basic 210



elements, as in our previous example of a single blood feeding haunt with several independent aquatic habitats representing a large house with multiple mosquito breeding ponds in the backyard; the flexibility can accommodate complex ecological dynamics of structured habitat and behavior such as skip oviposition. All these elements determine where a mosquito attempts to do something on the landscape and affects its probability of success and survival.

### 2.1.1 Mosquito Dispersal

Inter-site mosquito movement in MBITES is modeled during some behavioral bouts. The destination is determined by a probability mass function giving the probability of traveling to another haunt, conditional on the location of the haunt the mosquito has just left, which we consider the result of a *search*. A mosquito may decide to leave a haunt for several reasons, but once it has left, it picks a destination according to this mass function, which we call the haunt-specific movement kernel.

Computation of the probability distribution functions describing dispersal to each haunts from any starting point is done prior to the MBITES simulation; the simulation accepts as input the computed probability vectors giving inter-point movement.

As utilities for setting up simulations, MBITES has developed some simple parametric functions to compute these probabilities as a function of distance and an activity-specific *search weight*,  $\omega_x$ , where  $x$  denotes a particular blood feeding haunt or aquatic habitat. These functions thus provide multiple ways of computing the probability of moving from one haunt to any other haunt, optionally conditional on behavioral state.

## 2.2 Behavioral States and Other Variables

Simulations in MBITES include variables describing mosquito behavioral states and other states that maybe relevant for survival [8]. At any point during a mosquito's lifespan, it will seek to mate, sugar feed, blood feed, or lay eggs; these are biological imperatives that must be accomplished to survive and reproduce. In terms of simulation, this means that at all points in time a mosquito is alive, it belongs to one of a discrete set of behavioral states that govern its actions while in that state, as well as what state it is likely to transition to next.

Transitions between behavioral states were developed around a basic description of adult mosquito behavior. A newly emerged female mosquito must harden and mate before it is mature, whereupon it begins a cycle of blood feeding and egg laying throughout the rest of its life. After a search to find

suitable blood meal hosts, the mosquito selects a host and approaches it in an attempt to blood feed. 240  
Assuming it is successful, after the blood meal, the mosquito typically rests to lose some of the water 241  
weight in a post-prandial resting period. During this time, blood is provisioned into eggs that require 242  
some time to mature. Once the egg batch is mature, the mosquito initiates a search to find a suitable 243  
aquatic habitat and then lays eggs. Sugar feeding occurs from time to time, depending on the species 244  
and the mosquito's energetic needs. 245

In order to allow detailed simulation of activities mosquitoes undertake during each behavioral state, as 246  
well as allowing for flexibility to account for differences among species, behavioral algorithms simulate 247  
specific actions mosquitoes take as they attempt to accomplish goals associated with each state, as well 248  
as transitions to future states. While there is a general pattern to be followed (*e.g.* blood feed, rest, lay 249  
eggs, and repeat), each mosquito follows a probabilistic sequence through a set of distinct phases 250  
surrounding the activity bout as they seek to accomplish their goals. Transitions between behavioral 251  
states depend on various internal characteristics of the individual mosquito and logical prerequisites. Egg 252  
batches must mature before a mosquito is considered gravid and enters the egg laying state. If a 253  
mosquito is gravid, it will tend to lay eggs, though re-feeding can occur regardless (see below). Otherwise, 254  
disregarding sugar feeding and mating for the moment, a mosquito's state is oriented towards blood 255  
feeding. A mosquito must leave a haunt to initiate a search if the resources it needs are not present, but 256  
a decision to leave the haunt and initiate a search can also occur even if resources are present, depending 257  
on other events that occur during a bout and properties of a haunt. For example, area repellents could 258  
increase the probability of a failure, and force a mosquito to initiate a new search. 259

In addition to a mosquito's behavioral states, MBITES includes a set of other variables making it 260  
possible to model heterogeneity among individual mosquitoes in extreme detail. Each mosquito in 261  
MBITES is described by internal variables that include but are not limited to: physical and physiological 262  
condition, energy reserves, size of the most recent blood meal, the number of mature eggs ready to be 263  
laid, infection status, physical condition, and a set of variables related to sugar feeding and mating. For 264  
example, inter-site movement is physiologically stressful on the mosquito, and during travel between 265  
haunts, a mosquito's energy level (an optional variable) can be decremented. The energy level can be 266  
replenished by blood meals (for females), or sugar feeding, and could be modeled as an important source 267  
of mortality while searching in resource-sparse environments. A random variate is drawn to determine 268  
the amount of physical damage (*e.g.*, wing tattering) that was incurred and modifies its physical 269  
condition or physiological damage (*e.g.*, after exposure to insecticides). Physical and physiological 270  
damage takes a cumulative toll on the mosquito. 271

MBITES is capable of modeling both female and male mosquito populations and behavior. For female 272

mosquitoes, the primary behavioral states are blood feeding and egg laying (the two necessary components of the gonotrophic cycle). In this manuscript, male mosquitoes are not considered and the optional behavioral states of sugar feeding and mating and all associated variables have been turned off in order to introduce and focus on algorithms describing blood feeding and egg laying by females.

Each behavioral state – blood feeding or egg laying – requires one or more activity bouts. Additionally, each behavioral state may require one or more *types* of activity, namely *searching* or *attempting*. Thus the set of possible activity bout types each associated with a behavioral state has been denoted by a letter (Figure 1, Table 2): the blood feeding search bout (F); the blood feeding attempt bout (B); the search bout for egg laying (L); the egg laying attempt bout (O). A letter is also assigned to the post-prandial resting period (R) that always follows a blood meal, which is a part of the blood feeding attempt bout.

Because we assume that regardless of behavioral intent, mosquitoes always need to launch themselves into the air prior to the activity bout and rest after the activity before the next launch, these phases are a common part of each behavioral state and activity bout. The endpoint of each bout type is either death (D) or another bout and possibly a behavioral state transition (Table 2, Figure 1). The structure of each bout type is different, and it is possible to modify the models to describe what happens during each bout in virtually unlimited detail. These paths through a bout are sampled from appropriate distributions that determine whether the bout resulted in death, success (state transition), or failure (remain in the same behavioral state). These activity bouts, prefaced by a launch and ending with a rest, may be of varying duration, but encompasses all of the activity by a mosquito from launch to launch.

## 2.3 The Activity Bout

Regardless of behavioral state, all activity bouts have four phases: launch, do an activity, land, and rest (Figure 1). Launching itself into the air, finding a suitable landing spot, and resting prior to the next launch must occur regardless of the biological state of the mosquito (blood feeding or oviposition, in this manuscript). However because the purpose of activity bouts is to accomplish different biological goals, the activity phase of each bout depends on the behavioral state. Notably, the definition of an activity bout is defined as everything that happens from a resting state to resting state; during an activity bout, a mosquito may land briefly on a blood host or on water before taking a short flight to rest.

The modular nature of MBITES makes it possible to configure all these options to consider biological process of interest. While all bouts share similar structure and call on similar functions (*e.g.* optionally, flights could expend energy or contribute to cumulative wing damage), the activities and outcomes will

differ based on each individual mosquito's internal physiological state. Thus, a mosquito's life consists of a series of transitions between behavioral states, each of which may take several bouts to accomplish, completely determining a mosquito's activity throughout its life.

**Launch and Timing** A new bout begins the moment a mosquito launches itself into the air. The timing of the start of the launch phase is determined during the previous bout during the resting phase following landing. By sampling the time to next launch at this point in the simulation, launch times can be (optionally) conditional on events that have taken place during the previous bout.

**Do an Activity — Search or Attempt** After launching, the specific behavioral algorithms called by the mosquito depend on its behavioral state (decision point “state” in Figure 1), as well as the local distribution of resources necessary to fulfill the mosquito's current biological needs. A mosquito will either “attempt” to accomplish the task required by their behavioral state or “search” for the resource it needs to accomplish that task. In any particular activity bout, a mosquito will either “search” or “attempt”, but not both. Searching or attempting algorithms are behavioral state-specific, and will be called during that phase of the bout (attempting to blood feed, as illustrated in Figure 2, for example, means something very different behaviorally than attempting to oviposit, as illustrated in Figure 3). Details of the attempt algorithms are described below.

The searching algorithm moves a mosquito to a new haunt on the landscape to find resources, described in Section 2.1.1, while the attempting algorithm describes how a mosquito fulfills its behavioral imperatives once necessary resources are present, which will be described below for egg laying and blood feeding (Section 2.4).

There are many factors that determine whether a mosquito will make an attempt or begin a search. A mosquito will stay and make an “attempt” if the necessary resource is present at the haunt, but it could leave and initiate a “search” if it has previously been frustrated in its attempts or if the resource is not present. Many events occurring during the bout can trigger a decision to leave and initiate a search during the next bout. For example, if the mosquito is primed to blood feed and blood hosts are present, the mosquito will tend to approach a potential blood host and try to blood feed. If there are no blood hosts present, the mosquito will “search” and move to a new haunt. Even if blood hosts are present, after multiple failed attempts, or if the blood hosts are not sufficiently attractive, a mosquito may become frustrated and leave.

**Land** After its flight, a mosquito must land and rest. This must occur at one of the micro-sites at a haunt, as described earlier. During the landing phase, an algorithm called *restingSpot* simulates the mosquitoes choice of micro-site, and to simulate the consequences of landing there (*e.g.* encountering a sprayed surface or entering or leaving a house). Movement to a micro-site within a haunt to land and rest is designed to emulate short hops (*e.g.*, < 10m) a mosquito may take that differs from longer range searching behavior. The algorithm also tracks if the attempt was successful. Repeated failures at the same site may lead to the mosquito becoming frustrated, in which case the next activity bout will include a search regardless of resources availability.

**Rest** The duration of the resting phase, the time elapsed between landing and the next launch, will in general differ based on behavioral state, other state variables, and events that may have transpired during the bout. Several probability distribution functions are available to simulate heterogeneity in the time required by mosquitoes to accomplish certain tasks based on individual characteristics and spatial location. The default option is for these times to follow an exponential distribution.

During the resting phase, internal characteristics of the mosquito are updated, including cumulative wing damage, and internal energy reserves which have been used for flight. Egg batches (if present) are also checked for maturity, depending on if the mosquito has successfully blood fed, and if so how much. The next behavioral state is determined by the success or failure of the current bout. Other variables are also updated during this time, such as age and (if a pathogen model is present), infection status.

**Survival** A mosquito can die during at any point during a bout as a result of specific events, such as being swatted while attempting to blood feed, or as a result of contact with some vector control device. Survival through a bout is also computed during every resting phase. Mortality is associated with the stress of flight, which sets a baseline mortality probability (per flight). A mosquito must also survive any *local hazards*, which determine the site-specific probability of dying while landing or flying at each site, such as from predation by jumping spiders or dragon flies.

## 2.4 Attempt Algorithms

The following sections describe in detail the algorithms that determine how a mosquito makes an attempt to blood feed or oviposit. In addition, a separate section discusses the post-prandial resting period and algorithms for simulating oogenesis and re-feeding.

#### 2.4.1 Blood Feeding Attempt and Pathogen Transmission [B]

During an activity bout in which a mosquito attempts to blood feed (Figure 2), a detailed sequence of events describing the blood feeding attempt is simulated, any of which can result in a failure (the green nodes in Figure 2) with its associated state transitions (the green box in lower right of Figure 2). In the event of failure, the mosquito could either fail to survive the landing, be frustrated and leave the site to search for other blood hosts (a blood feeding search, F), or remain and try again (B).

When the mosquito attempts to feed on a blood host after launching, a sequence of critical processes must be simulated. Upon arriving at a site with viable blood hosts, the mosquito chooses a particular host at that site to approach from the atRiskQ object at that site, which maintains a list of available hosts (Section 2.1).

If the mosquito chooses a human host, a detailed sequence of events is simulated. First, the mosquito must approach and land on the host successfully. The approach can result in failure or death if it is deterred by swatting or a sudden movement or something else. If the mosquito survives the approach and lands on the human host, it will try to probe the host, which can also result in failure or death. Finally, if probing is successful, the mosquito proceeds to feed. When a mosquito blood feeds, a random variable is drawn to determine the blood meal size, which affects egg maturation and batch size. Notably, the blood meal could infect a mosquito if the human host is infectious. Following successful feeding, the mosquito will make a short hop within the current site and find a resting spot to digest the blood meal (post-prandial rest, purple oval), simulated by the *restingSpot* algorithm, where the specific micro-site for resting is chosen from the set of micro-sites available.

Note that it is during probing that mosquitoes could transmit pathogens from their salivary glands into humans infecting them. During blood feeding, mosquitoes could take up pathogens in blood and become infected. This functionality is part of MBITES, but the details are beyond the scope of this paper.

If the mosquito chooses a non-human host (or more generally, a blood host that is not suitable for the pathogen), probing is not modeled. A mosquito can either survive and blood feed, survive without blood feeding, or die. If the mosquito survives, *restingSpot* is called (as above).

#### 2.4.2 The Post-Prandial Resting Period and Oogenesis [R]

The postprandial resting period is part of the blood feeding attempt bout following landing (purple oval, Figure 2), but it requires special consideration. After calling *restingSpot*, a long delay is simulated which represents the time needed for diuresis and digestion to occur. Several options are available for modeling

survival and the events that follow as blood is concentrated and provisioned into eggs. First, mortality 391  
rates can be higher because the mosquito is heavy with blood, increasing the chance that they fall victim 392  
to successful predation [24]. Second, a function has been provided to model “overfeeding”: the 393  
physiological stress of processing a blood meal can kill a mosquito, so it is possible to model mortality as 394  
an increasing function of blood meal size. A function determines how much, if at all, the energy reserves 395  
are topped up by the blood in the blood meal. 396

During the resting period, an egg batch is produced; however, the mosquito will not be considered *gravid* 397  
until the batch is mature. The number of eggs in a batch is determined by a probability distribution 398  
function family, such as a discretized Gaussian distribution. Oogenesis (production of an egg batch) and 399  
the time delay to egg maturation is modeled explicitly in MBITES in three distinct model. MBITES has 400  
three models for oogenesis: first, a simple phenomenological model, which simply draws a random 401  
variate from a Gaussian distribution with mean and variance parameterized to match entomological 402  
understanding; second, a semi-mechanistic model in which the size of the egg batch is linearly 403  
proportional to the size of the blood meal, in which a new blood meal adds to the egg batch size; and 404  
third, a model in which the egg batch is linearly proportional to the size of the blood meal, but eggs 405  
from a new blood meal completely replace a previous egg batch. The third model is unrealistic but 406  
mathematically convenient (*i.e.*, it was included so that there would be a memoryless model that could 407  
exactly match the assumptions of MBDETES). 408

In the first oogenesis model, each egg in the egg batch is considered to require a certain “provision” of 409  
blood for its maturation. Because each egg requires its own resources, the total blood provision needed 410  
for a batch is a linear function of the egg batch size. After the blood provision has been fulfilled, which 411  
could require multiple blood meals, the egg batch is mature and the mosquito will become *gravid*. 412

In the other two models, time to maturation is modeled as a delay between the initial biological 413  
commitment of the mosquito to produce a batch of eggs, and the time when the mosquito is considered 414  
*gravid*, upon which it will be primed to transition to the egg laying behavioral state. The time to 415  
maturation implements a simple phenomenological model, where a random variate is drawn for the 416  
maturation time which is coincident with the resting period; after this time delay is fulfilled, the 417  
mosquito will become *gravid* and either search for suitable aquatic habitats (L) or attempt to oviposit 418  
(O), depending on the local availability of resources. re-feeding can occur in both these models. 419

### 2.4.3 Re-feeding

420

Re-feeding (the red diamond in Figure 2) is possible. A mosquito may take multiple blood meals prior to oviposition, and thus lengthens the time interval between successive oviposition attempts. re-feeding depends in part on the model for oogenesis, as an oogenesis model could explicitly force re-feeding when a batch of eggs is not yet mature.

421

422

423

424

When re-feeding is not forced by the oogenesis model, MBITES allows for probabilistic re-feeding behavior that can optionally be disabled. re-feeding behavior is a Bernoulli event that occurs when a mosquito is exiting the post-prandial rest (R) at the end of a blood feeding attempt bout. The probability of re-feeding is a function of either the size of the previous blood meal or the previous egg batch, accounting for mosquito propensity to top up the size of the egg batch before ovipositing.

425

426

427

428

429

### 2.4.4 Egg Laying Attempt and Oviposition [O]

430

After arriving at a haunt containing an aquatic habitat (i.e. after a search), or if the mosquito is already at a suitable haunt with one or more aquatic habitats, the mosquito chooses a particular habitat, or possibly an ovitrap (Figure 3). If a mosquito chooses an aquatic habitat, it will approach the habitat and attempt to lay eggs. The outcome of an egg laying attempt bout is either death, a failed attempt, or oviposition. Like the blood feeding attempt bout, mosquitoes can fail at any time during the attempt (green pentagons), which, if the mosquito survives the failed attempt, will lead it to either reattempt at the current site (L), or become frustrated and search for a new site (O). If a mosquito is successful it lays some fraction of her eggs in an aquatic habitat. If an ovitrap exists at a site, it competes for attractiveness with other aquatic habitats that may be present, and ovipositing mosquitoes could become trapped and die in it.

431

432

433

434

435

436

437

438

439

440

## 3 MBDETES

441

MBDETES (Mosquito Bout-based Differential Equation Transmission Ecology Simulator) is a system of coupled ordinary differential equations for modeling mosquito bout-based behavioral states and state transitions that offers analytical tractability but reduced flexibility compared with MBITES. MBDETES was developed as a way of approximating some models developed in MBITES: any MBITES model in which the behavioral state transitions are memoryless and the waiting time to the next state transition is always exponentially distributed is the stochastic analogue of a model in MBDETES.

442

443

444

445

446

447



The analytic tractability of MBDETES and speed of numerical solutions serves several purposes. First, we can check that the complex behavioral algorithms in MBITES are indeed functioning correctly, by comparing the output of Monte Carlo simulations against analytic solutions in situations where their expected behavior is known. Second, MBDETES provides a simple null case against which the importance of process stochasticity and individual level heterogeneity can be judged, allowing examination of situations where estimation of mean quantities through Monte Carlo simulation (*e.g.*, running MBITES repeatedly) deviates from the deterministic approximation. It is not the goal of MBDETES to produce a full deterministic approximation of the complete spatial dynamics of MBITES, but for model checking and investigating the importance of stochasticity on the individual level.

The variables in MBDETES equations represent the density of mosquitoes that are in each behavioral state, and the parameters describe state transition probabilities and associated waiting times. Let a variable name denote the population density of mosquitoes in each state, where the variable names in MBDETES matches the code letter for the behavioral states and the postprandial resting period in MBITES: blood feeding (B), egg laying (O), searching for blood (F), searching for habitats (L), and post-prandial resting (R), for each site. Let  $P_{XY}$  denote the proportion of mosquitoes transitioning from state  $X$  to  $Y$  after one bout, and let  $\Lambda_F(t)$  and  $\Lambda_B(t)$  denote the rates of mosquitoes emerging end entering into F and B states, respectively:

$$\begin{aligned}
 \frac{dF}{dt} &= \Lambda_F(t) + \gamma_B P_{BF} B + \gamma_O P_{OF} O + \gamma_R P_{RF} R - \gamma_F (1 - P_{FF}) F \\
 \frac{dB}{dt} &= \Lambda_B(t) + \gamma_F P_{FB} F + \gamma_R P_{RB} R + \gamma_O P_{OB} O - \gamma_B (1 - P_{BB}) B \\
 \frac{dR}{dt} &= \gamma_B P_{BR} B - \gamma_R R \\
 \frac{dL}{dt} &= \gamma_R P_{RL} R + \gamma_O P_{OL} O - \gamma_L (1 - P_{LL}) L \\
 \frac{dO}{dt} &= \gamma_R P_{RO} R + \gamma_L P_{LO} L - \gamma_O (1 - P_{OO}) O
 \end{aligned} \tag{1}$$

Note that there are some more general cases of MBITES (*i.e.*, with mating and sugar feeding) in which behavioral state transitions can be formulated as a continuous-time Markov process and could thus be described by similar systems of equations. MBITES models that build up state memory over time in a mosquito, breaking the memoryless assumption of Markovian systems (by depending on age, oogenesis, egg-batch size, or other variables which depend on previous states), could possibly be modeled, but they would require more complex systems of equations. In particular, the model of oogenesis in which re-feeding depends on previous blood meals would require modifying the state space to track egg batch

size, or use integro-differential equations. While such models can be built, they are beyond the scope of  
this paper.

## 4 Results

Behavioral state models, such as MBDETES and models developed in MBITES, are based on a detailed  
description of mosquito behaviors, behavioral states, and behavioral state transitions. These models do  
not supply the standard bionomic parameters. Instead, they show how mosquito bionomic parameters  
most relevant for transmission arise from the simple algorithms that drive the mosquito behavior. In  
addition, MBITES has additional built-in flexibility to show how these parameters are affected by  
geography (distribution of resources), ecology (interactions of mosquitoes with other biotic and abiotic  
elements of their environment), climate, and other factors external to the individual mosquito. The small  
set of summary statistics that has been traditionally used to describe aspects of mosquitoes relevant for  
transmission (Table 1) are thus emergent features of a complex interaction of mosquito behavior in an  
environment. In MBITES, these parameters arise naturally from mosquito behavior for a given place,  
shedding light into what aspects of ecology affect these population level summary metrics the  
most.

Here, using some models that were developed within the MBITES framework, we show how to compute  
these parameters and illustrate some basic features of mosquito ecology relevant for transmission. We  
also use MBDETES to verify MBITES (and *vice versa*).

### 4.1 VC and Bionomic Parameters

VC in MBITES models can be computed in two ways. First, VC could be estimated by taking the  
product of the average bionomic parameters, using standard formulas (Table 1). Second, the bionomic  
parameters are not specified as parameters in MBITES, but they can be computed as a summary  
description of mosquito behavior through Monte Carlo simulation.

It has been shown that the traditional formula for VC can be reduced to just three terms – the number  
of emerging adult female mosquitoes, per human, per day ( $\lambda$ ); the probability of mosquito survival  
through the extrinsic incubation period (EIP) of the pathogen ( $P$ ); and the expected number of human  
blood meals taken by a mosquito over its life, called the stability index ( $S$ ) [11]. The Ross-Macdonald  
formula for the VC is equivalent to:  $V = \lambda S^2 P$ . The stability index appears twice because pathogen  
transmission requires a mosquito to take two distinct human blood meals – one to infect the mosquito

and another to infect the pathogen's human host (after surviving the EIP and becoming infectious). 501  
Unlike the entomological inoculation rate, the VC does not rely on any information about the parasite 502  
reservoir in humans; that is, VC measures only the entomological capacity of a particular setting to 503  
sustain pathogen transmission, and is independent of prevalence of disease in humans [11]. 504

**Expectations in MBITES and MBDETES** One method to compute the bionomic parameters is 505  
by computing the expected transition probabilities from each state to all other states accessible from it. 506  
This discrete distribution can be calculated by following the sequence of Bernoulli events in Figures 2 507  
and 3, for example, taking expectation values at each step. By averaging in this way, the  $P_{X,Y}$  quantities 508  
for MBDETES can be computed from MBITES. The exact multinomial probability distribution over 509  
outcomes ( $P_{X,Y}$ ) for each bout can also be calculated numerically without simulation, by summing the 510  
relative probability of each path through the bout; certain branch points are based on random sampling, 511  
such as blood meal size, in these cases, we calculate the expectation with respect to the random variable 512  
by numerical integration (these functions can be found in the file 513  
<https://github.com/dd-harp/MBITES/blob/v1.0/MBITES/R/MBDETES-Calibration.R> in the 514  
MBITES package). 515

Using these methods, we can then compute quantities in MBITES or MBDETES linking estimates back 516  
to the bionomics commonly used as input (or derived as equilibrium) in Ross-Macdonald style models. 517  
From the single-bout transition probabilities and waiting times for each bout type,  $P_{XY}$  and  $T_X$ , we 518  
derived formulas for the proportion surviving and the waiting time for surviving mosquitoes to make the 519  
transition from:  $F$  to  $B$ , including loops back into  $F$ ; from  $B$  to  $R$  including loops back into  $F$  and  $B$ ; 520  
from  $L$  to  $O$ ; including loops back into  $L$ ; and from  $O$  to  $L$ , including loops back into  $L$  and  $O$ . The 521  
waiting time in each state  $T_X$  is determined by parameter, and the inverse is the rate parameter  $\gamma_X$  used 522  
for simulation in MBDETES (Table 2). These closed-form solutions for the means of these bionomics 523  
allow us to compare MBDETES to classical Ross-Macdonald parameters. 524

The inverse of this resting period to resting period waiting time maps onto the feeding rate parameter  $f$  525  
in the Ross-Macdonald model (see Table 1);  $T_{R,R} \mapsto 1/f$ . The rest to rest survival probability is also 526  
needed to link MBDETES to Ross-Macdonald parameters; this maps onto the probability of surviving 527  
through one feeding cycle,  $P_{R,R} \mapsto e^{-g/f}$ , or  $\frac{-\ln P_{R,R}}{T_{R,R}} \mapsto g$ . 528

**Monte Carlos Simulation in MBITES** In these simulations, there is a more direct way of 529  
computing the VC. For each mosquito from emergence to death, MBITES logs each activity bout, 530  
including the time, location, behavioral state, the values of other variables, the identity of every human 531

host probed, and the identity of every host who gave a blood meal. Mosquito survival can be computed simply from the distribution of the mosquito age at death. Similarly, the overall feeding frequency can be computed from the distribution of time intervals between successive blood meals.

The formulas for VC arise from an anthropocentric concept that counts events happening to a human on a day. Here, we compute VC directly by following every bite occurring on a single person on a single day, and then summing all secondary bites by the initial biting mosquito separated from the initial bite by at least EIP days. To put it another way, the average VC is the number of pairs of human bites separated by at least EIP days divided by the number of humans; the distribution of VC uses the infecting human as the reference (thus VC is in units of  $\text{human}^{-1} \text{day}^{-1}$ ).

To compute the VC in this way, the simulation output was summarized by counting up all pairs of bites with humans that could have accounted for transmission of a parasite/pathogen from one human host to another: 1) the first bite in the pair must have been a blood meal; only blood feeding can infect a mosquito; and 2) the second bite in the pair included all events in which a human was probed (as parasites or pathogens usually enter the wound in a matrix of salivary proteins during probing); 3) the time interval between the two events was greater than or equal to the EIP; 4) the number of secondary bites is tallied by adding them to the human who was bitten on the first encounter. Because all events in the simulation occur at a set of sites in space, the spatial dispersion of VC can be calculated by simply attaching the distance between these secondary bites from the primary bite to each pair of bites. This level of realism is possible because probing and blood feeding are accounted for separately and accurately in MBITES.

Notably, because MBITES simulates the blood meal as a process of probing followed by blood feeding, some mosquitoes may be killed or interrupted after probing but prior to blood feeding, so there will exist small differences in the computed quantities of VC from the classic Ross-Macdonald formula and computation via MBITES.

## 4.2 Verifying MBITES and MBDETES

To address a challenge facing most complicated individual-based models, we have identified models in MBITES that are the stochastic analogues of models in MBDETES. The following sections illustrate how this was done.

**Bionomic Parameters with MBDETES** To compute some of the bionomic quantities in MBDETES, we set  $F(0) = 1$  and  $\Lambda_F(t) + \Lambda_B(t) = 0$  such that the equations track a cohort as it ages.

Using these equations, we track the proportion surviving by age:  $F + B + R + L + O$ , the laying rate  $\gamma_O(P_{OF} + P_{OB})O$ , and the blood feeding rate,  $\gamma_B P_{BR}B$ . In practice, given these initial conditions, this set of equations can be numerically solved to derive bionomic parameters of interest.

To compute the length of one feeding cycle, a set of equations was developed to separate the resting state into two variables: a cohort that had just entered and could only leave ( $R_1$ ), and an absorbing state they would never leave ( $R_2$ ). The length of a feeding cycle was computed by setting  $R_1(0) = 1$ , and letting the equations run until  $R_2$  was no longer changing. The asymptotic level for  $R_2$  was the computational equivalence of mosquitoes surviving one feeding cycle, and the mean value of  $R_2$ , conditioned on surviving, was the average duration of one feeding cycle.

**Mapping MBITES onto MBDETES** A challenge for most complex individual-based models is having a method for verification. Here, for a comparatively simple model developed in MBITES, there is a theoretical match to a system of ordinary differential equations formulated in MBDETES. The two models can be used for mutual verification.

A model in MBITES that maps onto a set of equations in MBDETES works on a “trivial” landscape such that there were three haunts, one haunt with only a blood feeding resource, one haunt with only an aquatic habitat, and one haunt with both types of resources (*i.e.*, a peri-domestic haunt), with symmetric movement probabilities. Exponential distributions were used to sample all waiting times for behavioral state transitions, and re-feeding probability is only a function of blood meal size. We summarized the Monte Carlo simulation in MBITES by computing histograms, which were overlaid on top of density functions computed in MBDETES by numerically solving the system of Kolmogorov forward equations (Equation 1).

For MBDETES, having matched parameters to MBITES, if we set  $\Lambda_F(t) = \Lambda_B(t) = 0$ , and let  $dD/dt = -dF/dt - dB/dt - dR/dt - dL/dt - dO/dt$ , and initial conditions such that  $F + B + R + L + O + D = 1$ , then the system of equations in MBDETES are the Kolmogorov forward equations (master equations) for individual behavioral state space trajectories for some particular model in MBITES. In this interpretation, the state variables  $F, B, R, L, O, D$  represent the distribution of probability density over the set of states a mosquito may belong to at any point in time  $t$ . If provided with an initial density over states at  $t = 0$ , the numerical solution gives the time evolution of the probability to find a mosquito in any state at any time  $t$ .

In Figure 4 we show a comparison of MBDETES and MBITES for several bionomic parameters, where MBITES was simulated under a set of simplified conditions such that MBDETES correctly describes the predicted probability density functions of the parameters. Bionomic parameters for MBITES were

computed from simulation output and compared to deterministic approximations from MBDETES by 594  
overlaying histograms over predicted density functions and comparing means (Figure 4). MBDETES was 595  
simulated by numerically solving the system of Kolmogorov forward equations (Equation 1). Under this 596  
set of assumptions, the numerical results from MBDETES are matched by the results of the MBITES 597  
Monte Carlo simulation. 598

### 4.3 Dispersion in MBITES 599

Because the specific trajectory a mosquito takes is a random process that depends on the particular 600  
haunt containing the aquatic habitat from which it emerged, the complex interactions between a 601  
mosquito's internal behavioral state, the spatial arrangement of haunts and resources, and the movement 602  
of human (and non-human) blood hosts, the movement of mosquitoes on a landscape is an emergent 603  
consequence of how these various algorithms interact. Averaging across all location-specific movement 604  
kernels gives a sense of how far mosquitoes are likely to travel (Figure 5), though the realized 605  
distribution for any particular simulation will differ depending on how often each route is used. 606

Dispersion in MBITES is a probability mass function describing the distances traveled as mosquitoes 607  
redistribute themselves among point sets: all distances traveled are drawn from the set of pairwise 608  
distances among sites. The dispersal kernels can be visualized directly for each site (*i.e.*, the probability 609  
mass on each distance), or from a simulation or overall: we compute the empirical cumulative 610  
distribution function (eCDF) of distances traveled; 2) fit a smooth curve to the eCDF; and 3) take the 611  
derivative of the smoothed eCDF. These smoothed kernels were estimated through the “lokern” package 612  
for R [25], and provide a rough estimate of how far mosquitoes will travel. 613

Distributions of mosquito movement by distance can also be directly calculated by Monte Carlo 614  
simulation through MBITES, allowing examination of characteristic scales of movement in the presence 615  
of specific models of human activity. Functionally relevant summaries of mosquito movement come from 616  
simulating MBITES and plotting these same kernels for spatial dispersion of VC as computed above 617  
(Figure 5). A key difference between these dispersal kernels and simulated empirical kernels is that the 618  
interactions between mosquitoes and humans will produce empirical kernels that are not necessarily the 619  
same as what one would obtain if we had simply used the dispersion kernels to smooth average bionomic 620  
parameters over space. 621

Because MBITES simulates discrete events in time as well as space, detailed measures of how mosquitoes 622  
disperse themselves and other quantities (secondary bites, eggs) through space can be calculated and 623  
described by probability density functions which give the probability to observe some event as a function 624

of distance. In Figure 5, densities for one particular landscape were calculated by taking the empirical  
cumulative distribution function (CDF) from simulation output, applying a smoothing algorithm to  
estimate a smooth CDF, and differentiating to estimate a probability density function (PDF) [25]. Four  
measures of dispersal were computed. First, the upper left density is the average site to site movement  
kernel, and shows the average “one hop” distance a mosquito will make during a activity bout if it leaves  
to search. Cumulative dispersion (upper right) is the average distance traveled by a mosquito summing  
over all hops in its lifetime. Absolute dispersion (lower left) summarizes the mean *displacement* of  
mosquitoes; that is, the distance between their natal aquatic habitat they emerge as adults from and the  
site of death. Most relevant for pathogen transmission is VC (described in Section 4.1), for which the  
average distance between each pair of secondary bites is a measure of the capability of the local ecology  
and vector population to sustain pathogen transmission spatially. Dispersion of secondary bites tracks  
much more closely measures of absolute dispersion rather than cumulative distance traveled, which will  
be explored in greater detail below.

#### 4.4 Co-Distribution of Resources

Searching behavior, in which mosquitoes take long range flights or many short hopping flights to look for  
resources, plays a crucial role in mosquito behavior but also contributes an important source of mortality  
that could be avoided if local resources are plentiful. The distribution of local resources structures  
mosquito movement, therefore, holding all else constant, the amount of time a mosquito spends searching  
for resources should affect the various summary bionomics that describe the mosquito population and its  
ability to be effective vectors of pathogens. To illustrate the effect of distribution of resources on the  
bionomic parameters, we conducted a set of experiments showing the influence of resource  
co-distribution on summary bionomics.

The set of *in-silico* experiments was designed to explore how bionomics changed as a function of the  
availability of peri-domestic habitats, which describes the proportion of blood feeding at haunts that  
have a viable aquatic habitat in the local vicinity; in terms of simulation, a peri-domestic haunt has both  
types of resources present. The proportion of haunts with viable aquatic habitats nearby may differ  
depending on local distribution of resources. The extent to which the haunts get visited depends the  
extent to which there is significant correlation between the set of points at which mosquitoes can locate  
suitable blood meal hosts and the set of points at which mosquitoes can oviposit egg batches.

To examine the effect of peri-domestic habitats on generated mosquito bionomics, 26 resource landscapes  
were generated, each containing 250 blood feeding haunts, and 250 aquatic habitats. peri-domestic  
habitats (the percent of haunts that contained both resources), ranged from 0% in landscape 1, to 100%

in landscape 26. Put another way, in landscape 1, each site contained *either* a blood feeding haunt *or* an aquatic habitat, whereas in landscape 26, each site contained *both* types of resources. In all landscapes the total number of resources was held constant as described above. Spatial variance in location of haunts was simulated by choosing 25 parent points for blood feeding haunts, and then scattering 9 offspring blood feeding haunts around each parent, for a total of 250 haunts in 25 clusters. In the simulation where peri-domestic habitats was held at 0%, aquatic habitats were simulated independently using the same algorithm. For all other landscapes, overlap was simulated by selecting some fraction of the total number of aquatic habitats and attaching them randomly to blood feeding haunts.

In each simulation, all biological parameters were held constant such that the only varying parameter was the spatial arrangement of resources. In addition, mosquito emergence rates from each aquatic habitat was also held constant, such that on average, each habitat produced one adult female per day. We acknowledge that in the absence of population dynamic feedback effects the model may not correspond to any true ecological system. For the specific analysis considered here, we are specifically interested in how spatial arrangement of resources affects how mosquitoes distribute their time across behavioral states, and the effect it has on commonly used bionomic parameters. We intend to revisit the question of population dynamic feedback effects in future research.

#### 4.4.1 Sensitivity of parameters to peri-domestic habitats

To study sensitivity of bionomics to peri-domestic habitats, we calculated all bionomic parameters for each of the 26 simulated landscapes. Of particular interest was the change in VC as a function of peri-domestic habitats. As the percentage of blood feeding haunts with associated peri-domestic mosquito aquatic habitats increased, mean VC (measured in units  $\text{person}^{-1}\text{day}^{-1}$ ) increased by 2 orders of magnitude (Figure 7). While the *stability index*,  $S$  also increased as a function of peri-domestic habitats, the absolute difference between  $S$  evaluated at 0% and 100% peri-domestic was smaller, only increasing by one order of magnitude (Figure 7). Importantly, we currently assume no competition among mosquitoes during oviposition, but we note that nonlinear competition has been observed and can easily be included in the model, at the cost of complicating analytic analysis [23].

Significant differences were also observed in how mosquitoes transitioned between and partitioned their time over the set of behavioral states. To do so, we computed empirical state transition matrices for each landscape, consisting of the behavioral states  $F, B, R, L, O$ , plus an absorbing state  $D$  for death. For each mosquito, all jumps between states were tabulated in the transitions matrix  $\mathbf{T}$ , which was then normalized such that  $\mathbf{T}e' = 1$ . These empirically estimated Markov transition matrices are displayed as chord diagrams in Figure 8 for 0%, 50%, and 100% peri-domestic habitats. Transitions between states



are represented by colored edges, where width of the edges is proportional to the probability of that transition. Colored areas on the circumference of the diagram represent the states, where size is proportional to that element of the quasi-stationary distribution for that landscape (the mean proportion of time spent in that state, conditional on survival). From 0% to 100% peri-domestic habitats the probability of a blood feeding search leading to another search dropped from 0.90 to 0.17 in the most resource-rich setting, which we consider as easy access to local resources. To determine how mosquitoes partitioned their time across these states, for each normalized matrix  $\mathbf{T}$ , we calculated the quasi-stationary distribution across the transient states  $F, B, R, L, O$  [26]. This distribution describes how a mosquito spends its time, conditional on survival. At the 0% condition, mosquitoes spend near 77% of their time prior to absorption searching for blood meals, and close to 12% of their time searching for suitable aquatic habitats to oviposit. At 100%, these proportions drop to a mere 11% and 6%, respectively (Figure 8).

For each of the 26 resources landscapes, we also calculated mosquito lifespan, number of human blood hosts (*stability index*), duration of feeding cycle, blood feeding rate, absolute and cumulative mosquito dispersion, VC, and spatial dispersion of VC (Figures 9, 10). As the resources were rearranged to increase peri-domestic habitats, lifespan, number of blood hosts, and blood feeding rate increased, while duration of the feeding cycle decreased. Certain bionomics, such as blood feeding rate, and length of feeding cycle tended to reach a plateau after peri-domestic habitats increased beyond about 20%, as the mosquito life cycle does not allow these values to change indefinitely. Cumulative mosquito movement (the cumulative distance traveled in all activity bouts) decreases as peri-domestic habitats increases; as the environment becomes more resource rich, mosquitoes do not need to travel as far to fulfill their biological intent (their current behavioral state). In contrast, absolute dispersion (the *displacement* of a mosquito between the natal habitat they emerged from and where they died) stays relatively constant as a function of peri-domestic habitats. This apparent discrepancy between the simulation results and intuition can be understood by noting that while the percent of haunts that were considered peri-domestic changed between the 26 landscapes, the spatial arrangement of haunts did not (distances and clusters were preserved). Holding these spatial characteristics constant implies that observed differences are due solely to changes in search patterns of mosquitoes as resources become more or less locally dense.

As noted in Figure 7, VC increased dramatically as peri-domestic habitats increased. It is notable that at very low levels of peri-domestic habitats, the mean is strongly affected by a few outliers generating large numbers of secondary bites; the effect of these outliers is dampened as peri-domestic habitats increases and more humans contribute to secondary biting (Figure 10). Spatial dispersion of secondary bites remains relatively constant across landscapes; and follows closely the absolute dispersion of mosquitoes. This is primarily due to two effects. First, because VC was calculated assuming a pathogen

with an EIP of 10 days, only mosquitoes that survived at least that long would be able to contribute secondary bites, so the site that secondary bites would be successfully delivered to would be close to the site of the eventual death of the mosquito. Additionally, because the spatial characteristics of the landscape were not affected to a large extent by the rearrangement of resource overlap, although the absolute value of VC changed dramatically, its spatial dispersion did not.

## 5 Discussion

Using individual-based models describing adult mosquito ecology and behavior in exquisite detail, we have shown how mosquito bionomic parameters and dispersion arise from a set of mosquito behavioral algorithms in response to multiple resources and their spatial arrangement. In particular, we have rediscovered the importance of search as a critical factor determining both bionomics and dispersion; in these models, search and dispersion are strongly affected by the co-distribution of resources [27]. The resource landscape affects not just where mosquitoes do things, but also what they do. To put it another way, the bionomic parameters of a model are jointly affected by innate traits that determine the mosquito behavioral algorithm (*i.e.*, by a species biology) and by the ecology. The resulting bionomic parameters are a joint feature of both.

After more than one century of studying mosquito behavior, medical entomologists have assigned approximate bionomic parameter values to most of the parameters for most of the dominant vector species that transmit human infectious diseases. These have been assembled from hundreds of studies conducted in various ways over several decades. Biology and genetics constrain the mosquito behaviors giving rise to differences in behavior and differences in the average value of traits assigned to some species. While there are differences among species in various species traits, our simulations suggest important bionomic parameters must also be partly determined by the local resources and ecology. There is, for example, a difference between anthropophily and anthropophagy: the former describes a degree of preference and the latter an outcome of that preference expressed as mosquitoes choose from available hosts. An important question to be resolved in future studies is which reported parameter values for a species are in fact fairly robust to differences in ecology and which ones suffer from reporting bias. If bionomic parameters proved to be robust to ecological differences, why? The difference between species' traits and their expression in context – a measure of species plasticity – are important for transmission dynamics and control.

The ecological factors affecting vectors and transmission are part of the local heterogeneity that matters for malaria transmission dynamics and the responses to control. The importance of local conditions was

expressed eighty years ago by Hackett [28]:

*Everything about malaria is so moulded by local conditions that it becomes a thousand epidemiological puzzles. Like chess, it is played with a few pieces but it is capable of an infinite variety of situations.*

This has been quoted frequently by malaria epidemiologists, but it has been difficult to reconcile this picture with the simple view of malaria arising from the elegant concepts of VC and entomological inoculation rates, which summarize in a single number the factors that are most likely to affect transmission. If malaria transmission dynamics and control is best described as a collection of puzzles to be solved, and not effectively summarized by VC or EIR, then what other aspects of vector biology matter? VC has a virtual hegemony in mechanistic models (where EIR is a derived concept), due partly to its simplicity and sound logic [13]. While recognizing these concepts are, indeed, highly useful, and that they summarize the first important dimension of transmission, there are other questions that arise when these concepts are put into practice. What is the distribution of these parameters among individuals in a population, or across space or time? How do these factors change and interact in response to vector control? What ecological factors determine which modes of vector control are most likely to work in context? The view of malaria as a chess game has, perhaps, been most apparent in the variable responses of vector control, where small behavioral differences among species have affected the rates of contact with interventions and thus the outcome of control. Our results suggest that fine-grained heterogeneity in movement driven by the co-distribution of resources shape mosquito dispersion, and that among-individual differences in VC and its associated dispersion will also have strong effects on transmission.

A relevant lesson emerging from our analysis is how difficult it would have been to try and piece together estimates of mosquito bionomic parameters by measuring just directly observable aspects of mosquito behavior. In retrospect, it is remarkable that investigation of transmission by mosquitoes has been so stable since it was jump-started by an intuitive leap by Ronald Ross [29]. Entomological work that followed over the next decades iteratively refined Ross's ideas culminating in a fully fledged theory of transmission [4,6], including field methods to measure a handful of relevant parameters. The large number of computations required to compute state transitions suggests the relevance of any particular direct observation of mosquito is only meaningful when it is measured along with all the other parameters, and the importance of any particular behavior for transmission would thus probably differ by context. It would probably have been extremely difficult to identify a metric like VC or any of the key bionomic parameters from watching the messy behaviors of mosquitoes. At the same time, our simulations have shown that it is important to challenge conventions and refine models; estimates of VC

are, in all likelihood, relevant for transmission only if they take into account measures of the dispersion of infectious bites [30,31].

In constructing MBITES we went to great lengths to ensure we could simulate any individual activity bout in nearly arbitrary complexity on landscapes of variable spatial resolution. Despite the enormous complexity, what became obvious was that much of what occurs during a single activity bout can be summarized by simple outcomes: death, failure or success to feed or oviposit, and resulting behavioral state transitions. We conclude that most of the complexity occurring during a bout is important only insofar as it affects outcomes, though it is possible that some events could affect other state variables with lingering effects on future reproductive success. Landscape details, on the other hand, proved to be enormously consequential for simulated outcomes.

Modeling mosquito behavior in exquisite detail can also help the study of pathogen transmission by mosquitoes, help shed light on the effect sizes of vector control, and explain heterogeneity in the outcome of control studies. Neither evidence nor theory alone could provide a sufficient basis for making any educated guess about how the values of bionomic parameters vary in a different ecological setting or the effect modification of setting on vector control. Ideally, a synthesis of existing studies would provide an evidence base for understanding how mosquito biology is molded by its ecological context, and how the ecological context and plasticity affects the outcomes of vector control. Existing studies do not adequately characterize a vector species across multiple settings. Studies are generally too heterogeneous in their design and implementation to be comparable across settings [32]. Few studies have identified systematic differences in mosquito bionomics looking across ecological contexts, perhaps because there is no theory to suggest what they should look for. These detailed models suggest the relevance specific mosquito behavioral studies are relevant only if other observations about behaviors provide enough context to add up to anything relevant for mosquito fitness or for transmission. In providing a synthesis, these behavioral state models provide an *in silico* laboratory to fill some of the gaps required to understand and synthesize much of the data on mosquitoes that is not directly related to estimation of the basic bionomic parameters.

We have presented here a mathematical and computational framework for simulation and analysis that can be used to investigate a broad range of questions about the interface between mosquito biology and life-history traits, the local ecology, and vector control. This framework was designed to evaluate heterogeneity and complexity through simulation, rather than through *ad hoc* approximation. While this approach has some disadvantages over parametrically simple models, it fills an important need by providing a way of testing whether those simple models cover all the relevant phenomena. MBITES makes it possible to systematically investigate whether the behavior of individual-based models ever

deviates from the behavior of parametrically simpler models of transmission, such as the 820  
Ross-Macdonald or MBDETES. The high degree of realism can also provide other functionality, such as 821  
power calculations for randomized control trials, investigation of bias and accuracy of field methods, *in* 822  
*silico* investigation of the interactions among vector-based interventions, and calibration of effect sizes 823  
versus coverage for vector-based interventions. 824

## References 825

1. GBD 2016 DALYs and HALE Collaborators. Global, regional, and national disability-adjusted 826  
life-years (DALYs) for 333 diseases and injuries and healthy life expectancy (HALE) for 195 827  
countries and territories, 1990-2016: a systematic analysis for the Global Burden of Disease Study 828  
2016. *Lancet*. 2017;390(10100):1260–1344. 829
2. Davey TH, Gordon RM. The estimation of the density of infective anophelines as a method of 830  
calculating the relative risk of inoculation with malaria from different species or in different 831  
localities. *Ann Trop Med Parasitol*. 1933;27(1):27–52. 832
3. Onori E, Grab B. Indicators for the Forecasting of Malaria Epidemics. *Bull World Health Organ*. 833  
1980;58(1):91–98. 834
4. Macdonald G. The analysis of the sporozoite rate. *Trop Dis Bull*. 1952;49(6):569–586. 835
5. Garrett-Jones C. Prognosis for interruption of malaria transmission through assessment of the 836  
mosquito's vectorial capacity. *Nature*. 1964;204:1173–1175. 837
6. Smith DL, Battle KE, Hay SI, Barker CM, Scott TW, McKenzie FE. Ross, Macdonald, and a 838  
theory for the dynamics and control of mosquito-transmitted pathogens. *PLoS Pathog*. 839  
2012;8(4):e1002588. 840
7. Garrett-Jones C. The human blood index of malaria vectors in relation to epidemiological 841  
assessment. *Bull World Health Organ*. 1964;30(2):241–261. 842
8. Silver JB. *Mosquito Ecology: Field Sampling Methods*. Third edition ed. New York: Springer 843  
Science & Business Media; 2007. 844
9. Killeen GF, McKenzie FE, Foy BD, Schieffelin C, Billingsley PF, Beier JC. A simplified model for 845  
predicting malaria entomologic inoculation rates based on entomologic and parasitologic 846  
parameters relevant to control. *Am J Trop Med Hyg*. 2000;62(5):535–544. 847

10. Bidlingmayer WL. The measurement of adult mosquito population changes—some considerations. 848  
J Am Mosq Control Assoc. 1985;. 849
11. Smith DL, McKenzie FE. Statics and dynamics of malaria infection in *Anopheles* mosquitoes. 850  
Malar J. 2004;3:13. 851
12. Brady OJ, Godfray HCJ, Tatem AJ, Gething PW, Cohen JM, McKenzie FE, et al. Vectorial 852  
capacity and vector control: reconsidering sensitivity to parameters for malaria elimination. Trans 853  
R Soc Trop Med Hyg. 2016;110(2):107–117. 854
13. Reiner RC Jr, Perkins TA, Barker CM, Niu T, Chaves LF, Ellis AM, et al. A systematic review of 855  
mathematical models of mosquito-borne pathogen transmission: 1970-2010. J R Soc Interface. 856  
2013;10(81):20120921. 857
14. Cooper L, Kang SY, Bisanzio D, Maxwell K, Rodriguez-Barraquer I, Greenhouse B, et al. Pareto 858  
rules for malaria super-spreaders and super-spreading. Nat Commun. 2019;10(1):3939. 859
15. Perkins TA, Scott TW, Le Menach A, Smith DL. Heterogeneity, mixing, and the spatial scales of 860  
mosquito-borne pathogen transmission. PLoS Comput Biol. 2013;9(12):e1003327. 861
16. Carter R, Mendis KN, Roberts D. Spatial targeting of interventions against malaria. Bull World 862  
Health Organ. 2000;78(12):1401–1411. 863
17. Carter R. Spatial simulation of malaria transmission and its control by malaria transmission 864  
blocking vaccination. Int J Parasitol. 2002;32(13):1617–1624. 865
18. Killeen GF, Seyoum A, Gimnig JE, Stevenson JC, Drakeley CJ, Chitnis N. Made-to-measure 866  
malaria vector control strategies: rational design based on insecticide properties and coverage of 867  
blood resources for mosquitoes. Malar J. 2014;13:146. 868
19. Kang SY, Battle KE, Gibson HS, Cooper LV, Maxwell K, Kanya M, et al. Heterogeneous 869  
exposure and hotspots for malaria vectors at three study sites in Uganda. Gates Open Res. 870  
2018;2:32. 871
20. Kiware SS, Chitnis N, Tatarsky A, Wu S, Castellanos HMS, Gosling R, et al. Attacking the 872  
mosquito on multiple fronts: Insights from the Vector Control Optimization Model (VCOM) for 873  
malaria elimination. PLoS One. 2017;12(12):e0187680. 874
21. Gattton ML, Chitnis N, Churcher TS, Donnelly MJ, Ghani AC, Godfray HCJ, et al. The 875  
importance of mosquito behavioural adaptations to malaria control in Africa. Evolution. 876

- 2013;67(4):1218–1230. 877
22. R Core Team. R: A Language and Environment for Statistical Computing; 2018. Available from: 878  
<https://www.R-project.org/>. 879
23. Munga S, Minakawa N, Zhou G, Barrack OOJ, Githeko AK, Yan G. Effects of larval competitors 880  
and predators on oviposition site selection of *Anopheles gambiae sensu stricto*. *J Med Entomol.* 881  
2006;43(2):221–224. 882
24. Roitberg BD, Mondor EB, Tyerman JGA. Pouncing spider, flying mosquito: blood acquisition 883  
increases predation risk in mosquitoes. *Behav Ecol.* 2003;14(5):736–740. 884
25. Herrmann E, Maechler M. *lokern: Kernel Regression Smoothing with Local or Global Plug-in* 885  
*Bandwidth*; 2016. 886
26. Darroch JN, Seneta E. On quasi-stationary distributions in absorbing continuous-time finite 887  
Markov chains. *J Appl Probab.* 1967;. 888
27. Saul A. Zoophylaxis or zoopotiation: the outcome of introducing animals on vector 889  
transmission is highly dependent on the mosquito mortality while searching. *Malar J.* 2003;2(1):32. 890
28. Hackett LW. *Malaria in Europe*. London, Oxford University Press; 1937. 891
29. Ross SR. *Report on the Prevention of Malaria in Mauritius*. 2nd ed. London: Waterlow & Sons 892  
Limited; 1908. 893
30. Smith DL, McKenzie FE, Snow RW, Hay SI. Revisiting the basic reproductive number for malaria 894  
and its implications for malaria control. *PLoS Biol.* 2007;5(3):e42. 895
31. Lloyd AL, Zhang J, Root AM. Stochasticity and heterogeneity in host-vector models. *J R Soc* 896  
*Interface.* 2007;4(16):851–863. 897
32. Guerra CA, Reiner RC Jr, Perkins TA, Lindsay SW, Midega JT, Brady OJ, et al. A global 898  
assembly of adult female mosquito mark-release-recapture data to inform the control of 899  
mosquito-borne pathogens. *Parasit Vectors.* 2014;7:276. 900

## 6 Appendix: Parameters and State Transitions

901

## 7 Acknowledgements

902

This research was principally supported by the ICEMR program at NIAID U19-AI089674 (DLS) and a grant from BMGF OPP1110495 (SW, HMSC, JH, QZ, DC, KC, RCR, DLS).

903

904



## 8 Figures

905

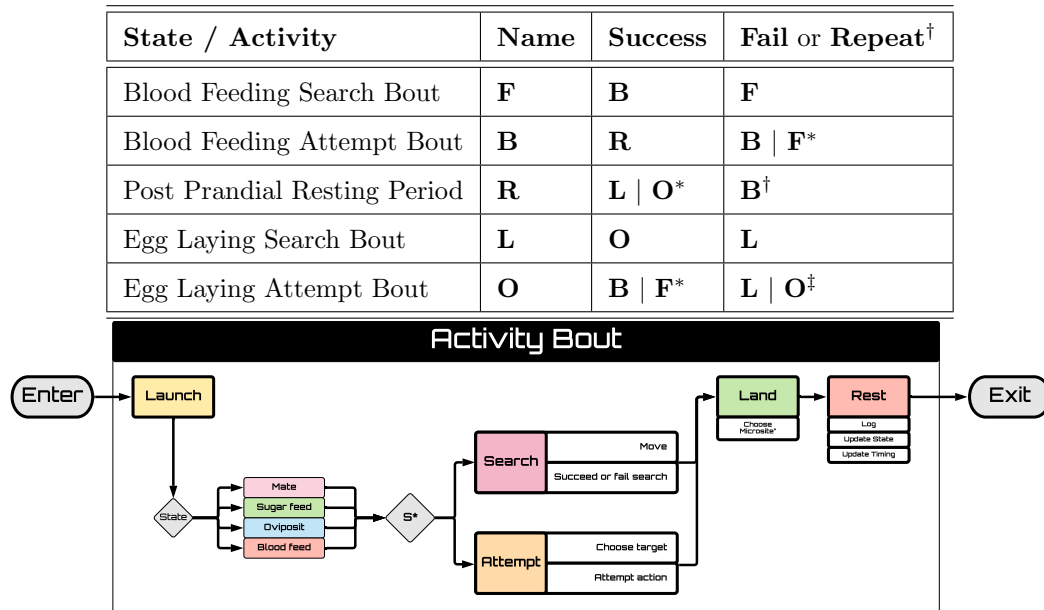

**Figure 1. Top)** MBITES and MBDETES model mosquito behavioral states and state transitions required for the gonotrophic cycle. The first two columns describe the behavioral state, and the last two columns describe the transitions. A mosquito is either searching for a blood host (F) or attempting to blood feed (B), searching for aquatic habitat (L) or attempting to oviposit (O), or resting (R). Transitions depend on whether the last bout was a success or failure, or an option for a mosquito to refeed<sup>†</sup> or to lay a partial egg batch and skip oviposit<sup>‡</sup>. The next state also depends on whether a mosquito decides to make an attempt or initiate a search\*. **Bottom)** In MBITES models, each behavioral state has an associated activity bout that has a common structure, as illustrated in the diagram. Each mosquito activity bout involves a sequence of four phases: launch, do an activity (either a search or an attempt), land, and rest. The type of activity is determined both by its behavioral state and by presence and availability of resources. A mosquito will stay (S) unless there are no resources present or if the mosquito has become frustrated (\*), in which case it will initiate a search. If the mosquito decides to stay, it makes a choice and an approach that may or may not succeed at what it was trying to do. When a mosquito lands, it selects a micro-site for a resting spot from the set of possibilities at that site. During the resting period, data from the last bout are logged, the behavioral state is updated, and the waiting time to the next launch is determined. A mosquito enters the bout either after emerging from aquatic habitat or after exiting its previous bout and surviving.

## Blood Feeding Attempt Bout

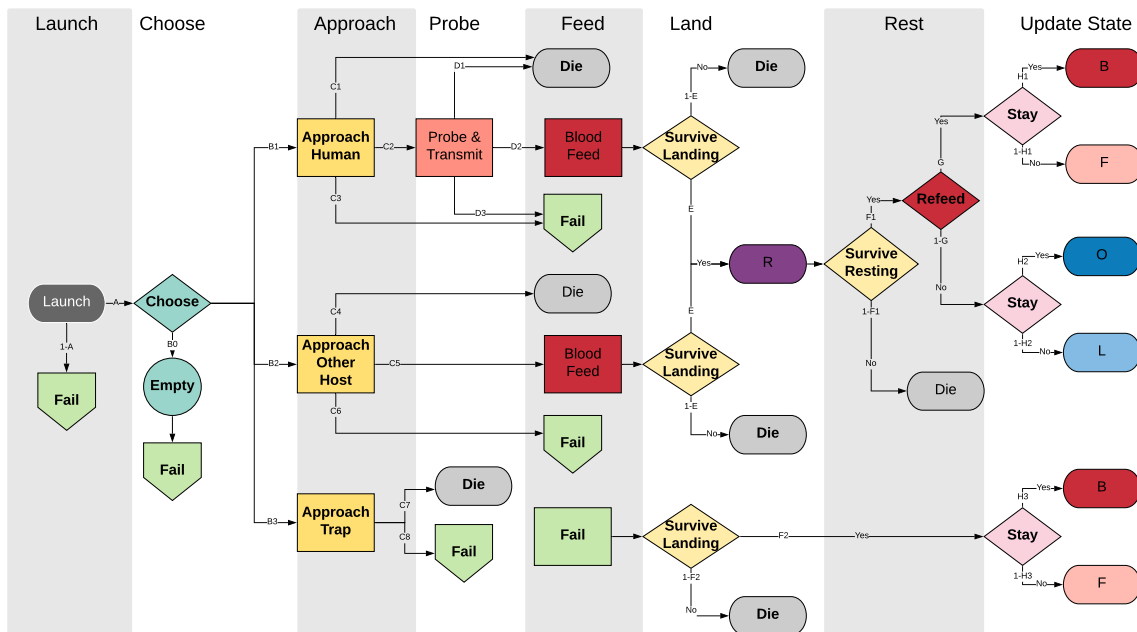

**Figure 2.** The structure of a blood feeding attempt bout in MBITES, a mosquito activity bout in which blood feeding is attempted. The flowchart follows the progression of a mosquito through simulated events, from the launch (dark grey oval), choosing a host from the atRiskQ (aquamarine diamond), and the events that follow depending on what sort of host was chosen (yellow rectangles). If a human is chosen (or more generally, a blood host that is also a host for the pathogen), then each mosquito must approach and attempt to probe (salmon rectangle) and then blood feed (red rectangle). If a non-human host is, probing is ignored. Traps mimicking a blood host can also be chosen. After a blood meal (red rectangle), a mosquito must land and choose a resting spot (yellow diamonds). A post-prandial resting period follows a successful blood meal which has its own hazards (purple oval), including additional hazards associated with a flight laden with blood, which may be followed by decision to feed again (dark red diamond). Similarly, after failing the attempt (green pentagons to green rectangle), a mosquito must land and choose a resting spot (yellow diamonds). At each step, it is possible to die (light grey ovals). At any point when failure occurs or during landing, a mosquito could choose to leave the haunt and initiate a search on the next bout. This condition is checked after completing the bout (pink diamond). At the end of a bout, the mosquito's behavioral state and other state variables are updated. The endpoint of each bout is either death (grey ovals), a repeated blood feeding attempt (dark red oval) or a state transition to either a blood feeding search (pink oval) or to oviposit (blue ovals).

## Egg Laying Attempt Bout

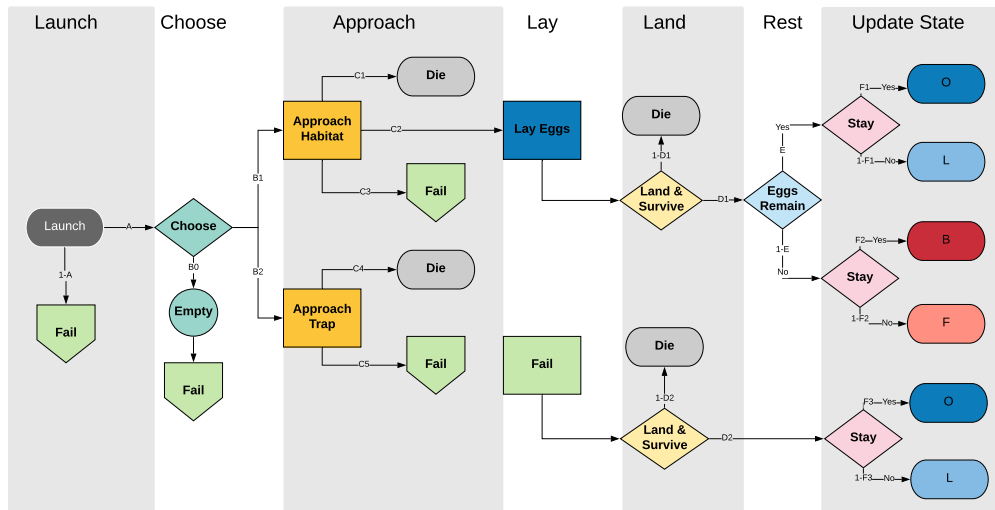

**Figure 3.** The structure of an egg laying attempt bout in MBITES, a mosquito activity bout in which oviposition is attempted. The flowchart follows the progression of a mosquito through simulated events, from the launch, choosing a habitat or trap from the eggQ (aquamarine diamond), and the events that follow depending on whether the mosquito chose a habitat or a trap (yellow rectangles). If a mosquito approaches the habitat, it could lay eggs. Alternatively, a mosquito could approach a trap and fail in the approach (thus surviving) or die (light grey ovals). If a mosquito is deterred in the approach to its habitat or the trap, it fails (green pentagons to green rectangle). After a successful approach to a habitat, a mosquito lays eggs (blue rectangle). After laying eggs or failing, a mosquito must land and survive (yellow diamonds). If not all eggs were laid, a mosquito can choose another habitat to lay (light blue diamond). At any point when failure occurs or during landing, a mosquito could choose to leave the haunt and initiate a search on the next bout. This condition is checked after completing the bout (pink diamonds). At the end of a bout, the mosquito's behavioral state and other state variables are updated. The outcome of each bout is either death (light grey ovals), a repeated egg laying attempt bout (dark blue ovals) or a state transition to either an egg laying search (light blue ovals) or a blood feeding attempt (red or pink ovals).

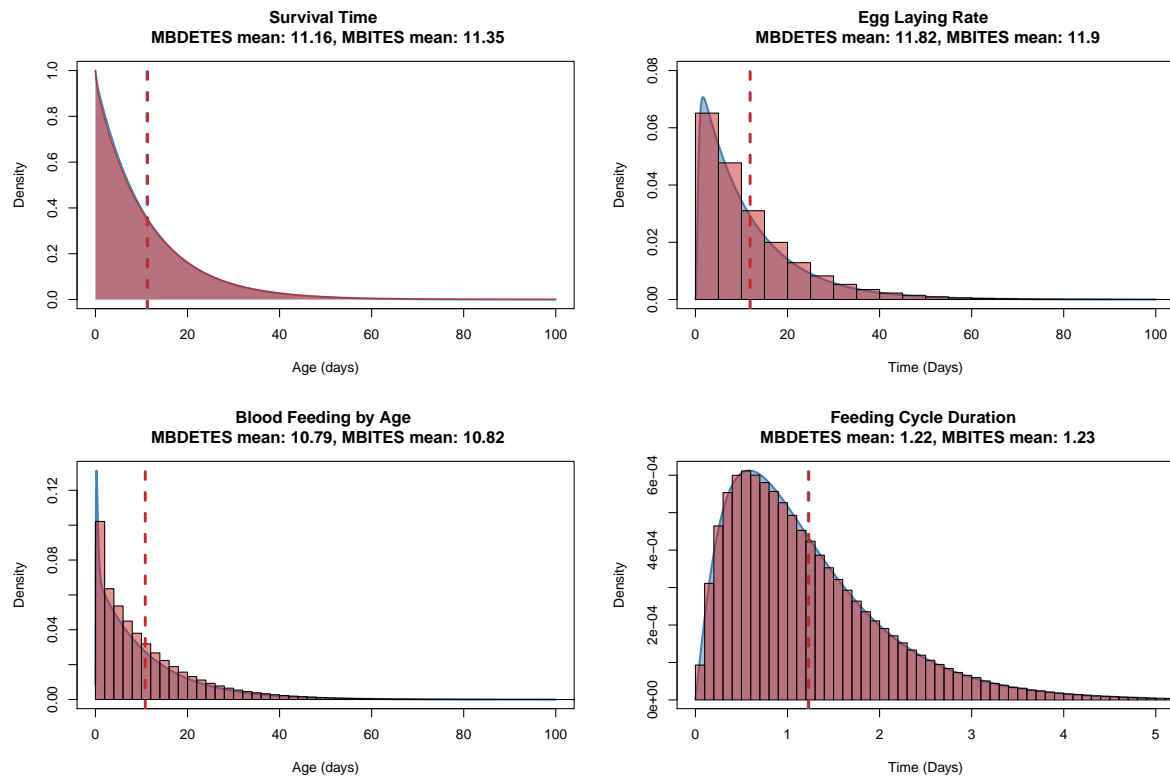

**Figure 4.** Comparison of results from MBITES and MBDETES under restricted (Markovian) assumptions on waiting times and state transition probabilities. In each panel, MBITES is summarized as a red histogram overlaid against the smooth density (in blue) predicted by MBDETES. In all cases both mean and variance see excellent agreement, with MBITES fluctuating around MBDETES due to finite sample size of mosquitoes in the stochastic simulation.

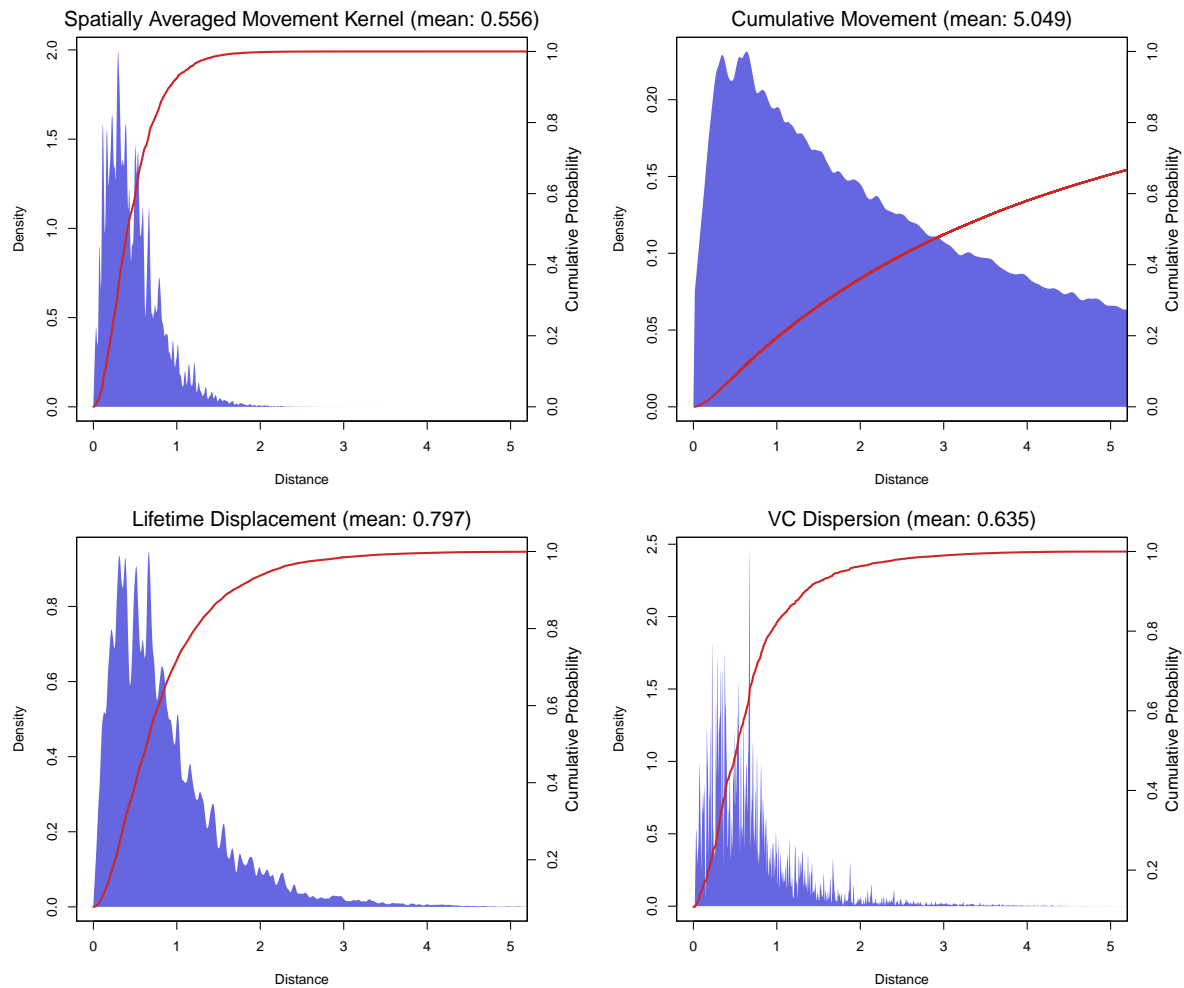

**Figure 5.** Mosquitoes move among a set of points, so the distances for each hop are always selected from among the set of pairwise distances among the haunts. Smoothed distribution (red line) and density (blue area) functions are displayed for summary statistics calculated for one particular landscape (the middle panel of Figure 6). The spatially averaged movement kernel (upper left) is simply the probability of movement by distance, averaged over all haunts on the landscape. Cumulative movement (upper right), gives the distribution of total distance traveled by mosquitoes over their entire lifetime, and has a long right tail. Lifetime displacement (lower left) is the absolute *displacement* of a mosquito, that is, the distance between the natal aquatic habitat they emerged from and the site at which their died. Dispersion of VC (lower right) shows the distribution of secondary bites by distance, and follows closely absolute displacement of mosquitoes. All plots are calibrated to the same x-axis for comparison.

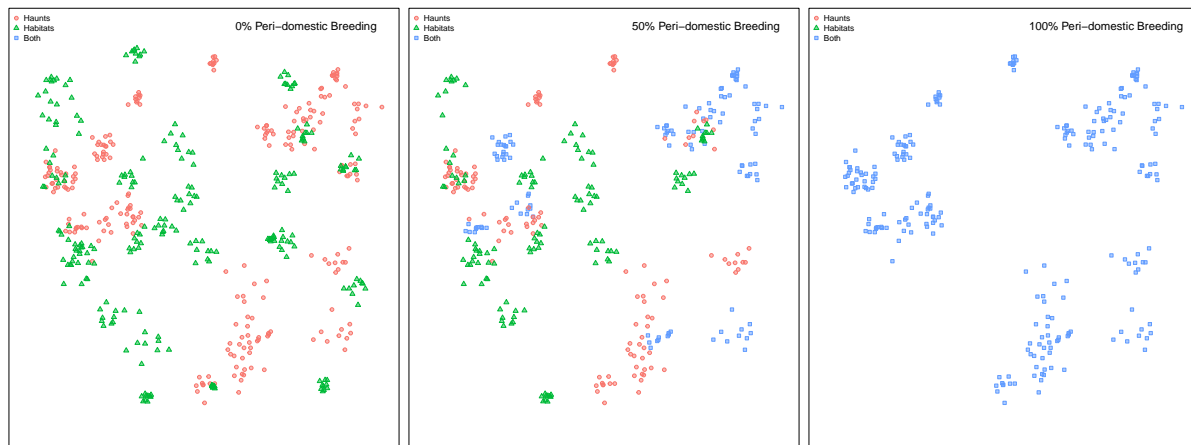

**Figure 6.** A visualization of 3 simulated landscapes at 0%, 50%, and 100% peri-domestic habitats. Haunts that contain only blood feeding haunts are plotted as red circles, haunts that contain only aquatic habitats are plotted as green triangles, and those haunts that contain both types of resources are shown as blue squares (*i.e.*, peri-domestic habitats). Dispersal kernels were calibrated as if this was an area of about 100 km<sup>2</sup>.

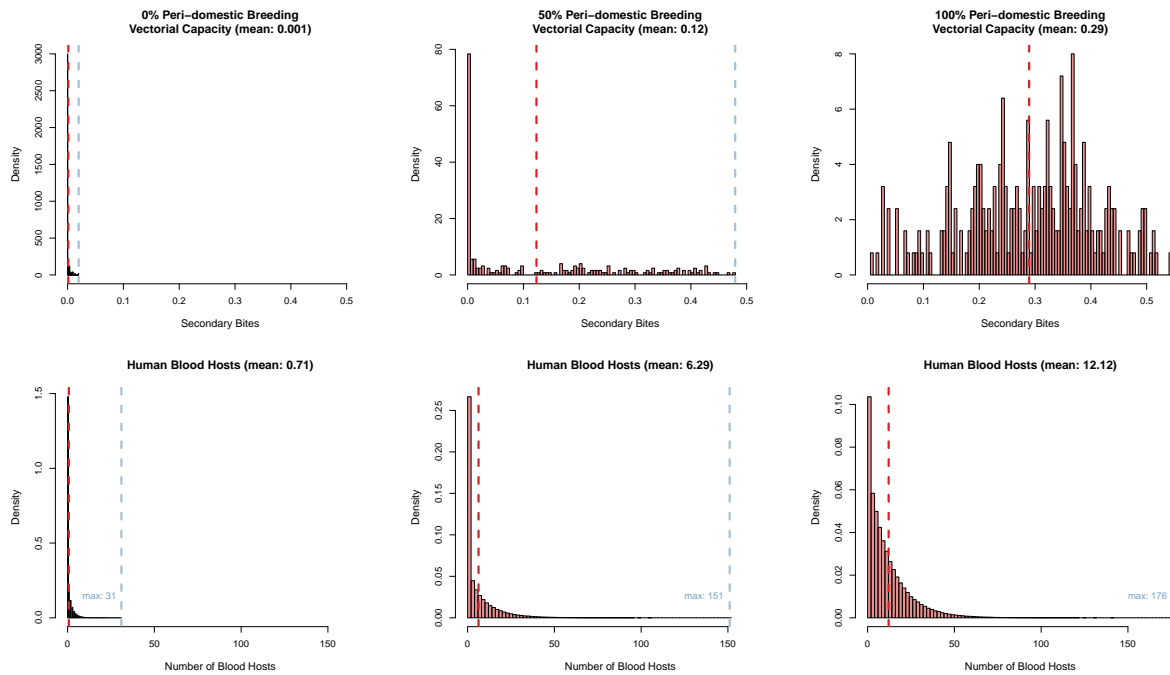

**Figure 7.** In MBITES, vectorial capacity (VC) is computed directly as the average number of infectious bites (*i.e.*, probing) arising from all the mosquitoes blood feeding on a single human on a single day; it is effectively the number of pairs of events where a blood meal is followed at least EIP days later by a mosquito probing, counting on all the humans. Summary VC (top row) and number of human blood hosts (bottom row; referred to as the *stability index* by Macdonald) are shown by column for 0%, 50%, and 100% peri-domestic habitats. Each histogram gives the distribution of VC or the number of human blood hosts across mosquitoes for that percent peri-domestic habitats.



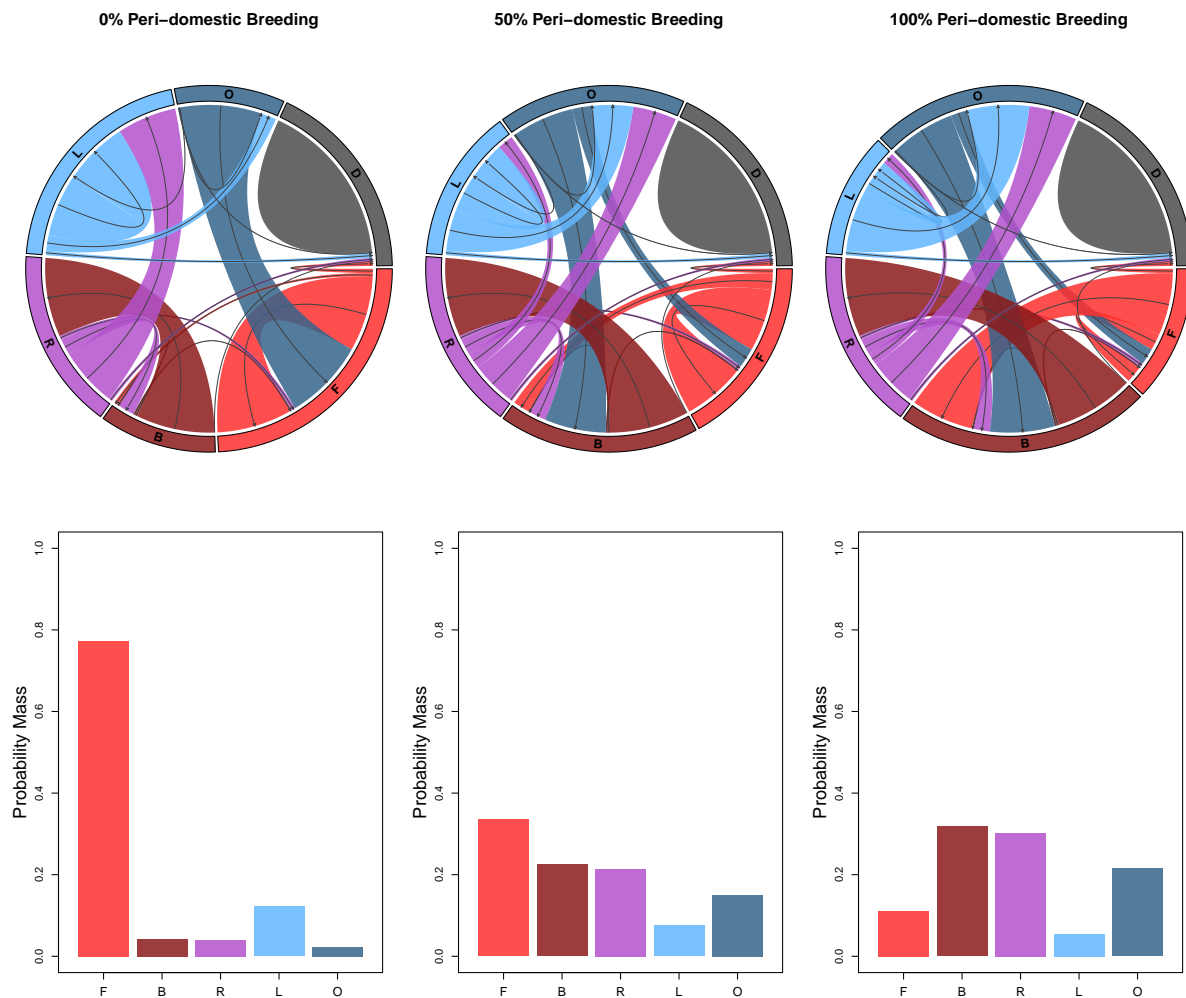

**Figure 8.** top) Chord diagrams showing the empirical state transition matrices for three of the 26 experiments (0%, 50%, and 100% peri-domestic habitats); bottom) The time spent in each state. These were calculated for each experiment by summing transitions for each mosquito between two states and then averaging to produce a Markov transition matrix. The width of the directed edges between each behavioral state is proportional to the probability of that transition, and the area on the perimeter of the circle labeled for each state is proportional to the mean time spent in that state. The three chord diagrams are accompanied by quasi-stationary probability distributions which give the asymptotic distribution of how a mosquito spends time across behavioral states conditional on survival.

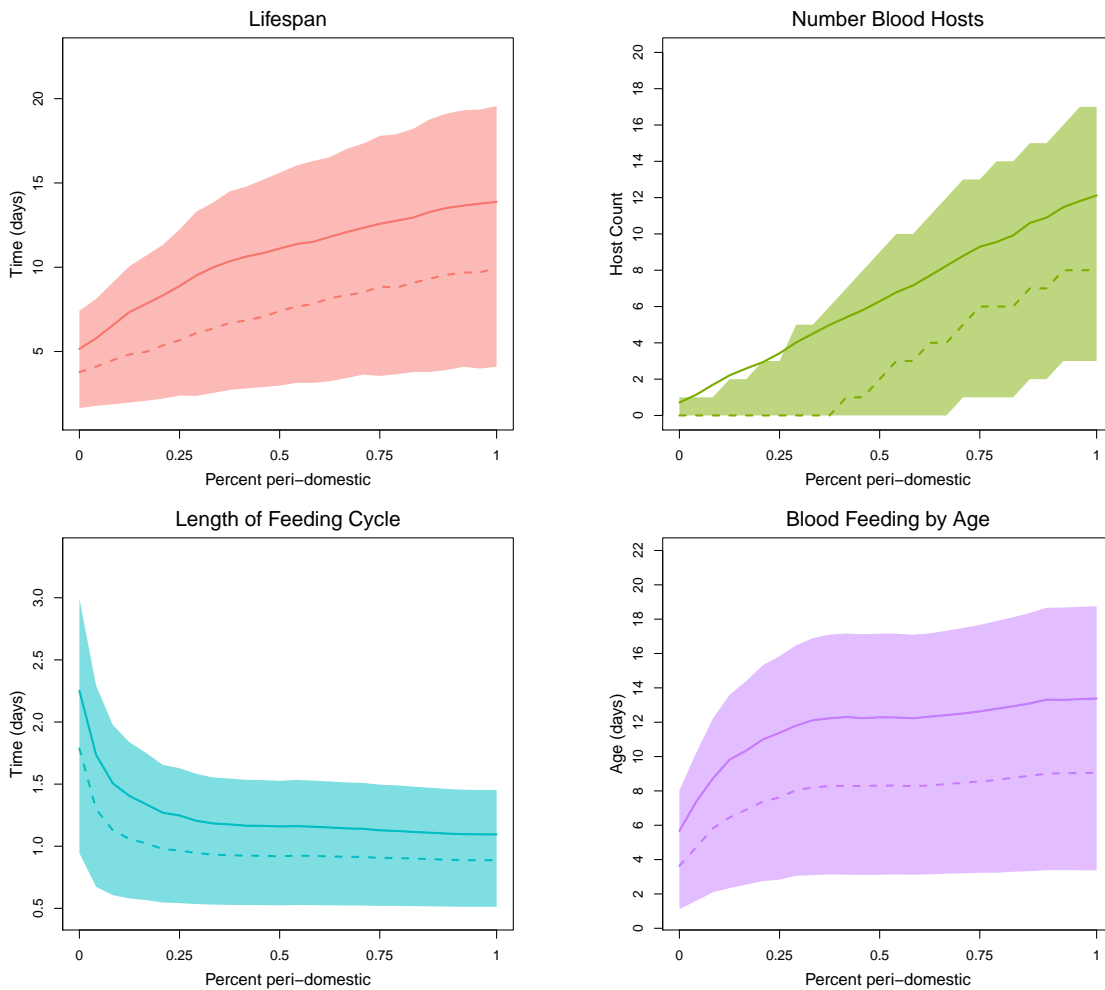

**Figure 9.** Simulations in MBITES illustrate that all of the biometric parameters are sensitive to the proportion of peri-domestic habitats, which gives a measure of how frequently a mosquito must search. The x-axis of each plot ranges from 0% to 100%, and each summary biometric parameter is plotted as mean (solid line), median (dashed line), and the shaded area covers the 20-80% quantile range of the data. The distribution of number of blood hosts (upper right) exhibits significant right skew, such that the mean exceeds the 80% quantile at low proportion peri-domestic breeding habitats. Because the simulations are stochastic, the exact number of mosquitoes from which Monte Carlo estimates of the biometric parameters were computed varied somewhat over the 26 landscapes, the mean was 45,6579 mosquitoes with a standard deviation of 754 mosquitoes.

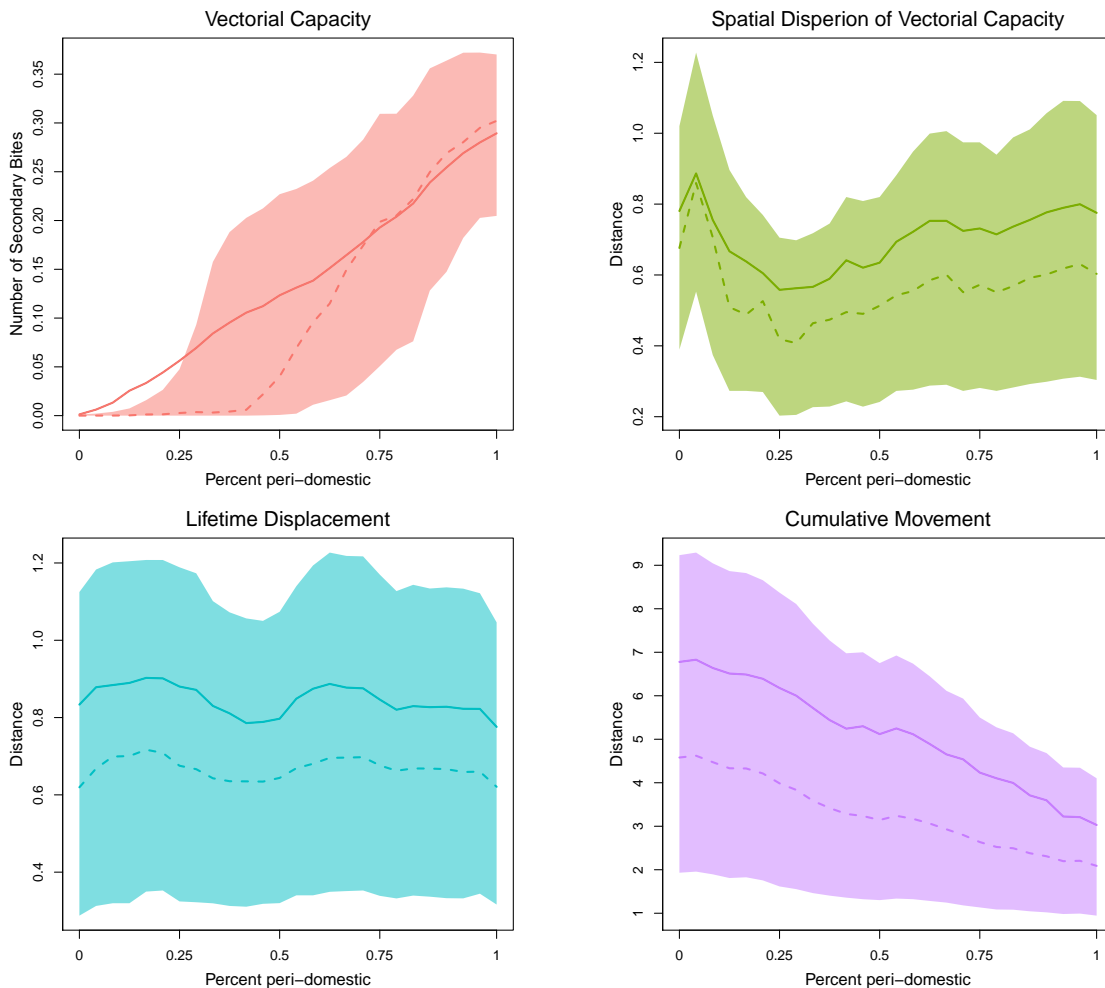

**Figure 10.** In MBITES, vectorial capacity (VC) and its dispersion are highly sensitive to the proportion of peri-domestic habitats. Interpretation of axes follows Figure 9, and each summary bionomic parameter is plotted as mean (solid line), median (dashed line), and the shaded area covers the 20-80% quantile range of the data. Number of secondary bites (upper left) produced increases dramatically as a function of peri-domestic habitats. Spatial dispersion (upper right) shows no strong trend however, due to the strong clustering of haunts in the landscape (it largely follows the trend of absolute mosquito dispersion (lower left), as opposed to cumulative movement (lower right). At low percent peri-domestic breeding habitats, significant right skew in the distribution of VC pulls the mean above the 80% quantile. Because the simulations are stochastic, the exact number of mosquitoes from which Monte Carlo estimates of the bionomic parameters were computed varied somewhat over the 26 landscapes, the mean was 45,6579 mosquitoes with a standard deviation of 754 mosquitoes.

## 9 Tables

906

|                |                                                              |
|----------------|--------------------------------------------------------------|
| $m$            | The number of female mosquitoes per human                    |
| $f$            | The blood feeding rate, per mosquito, per day                |
| $Q$            | Proportion of blood meals on the pathogens' hosts            |
| $g$            | The mosquito death rate, per mosquito, per day               |
| $n$            | Extrinsic Incubation Period (EIP), in days                   |
| $\lambda = gm$ | The number of female mosquitoes emerging, per human, per day |
| $S = fQ/g$     | The expected number of human blood meals per mosquito        |
| $P = e^{-gn}$  | The probability of surviving the EIP                         |

**Table 1.** The five parameters comprising the classical formula for vectorial capacity (VC or denoted  $\mathcal{V}$ ), describing the total number of infectious bites arising from all the mosquitoes feeding on a single human on a single day under the assumptions of the Ross-Macdonald model [4, 6, 11]. The expected number of blood meals on the pathogen's hosts, summed over a mosquito lifespan, is given by the term  $S = fQ/g$ . The probability of surviving the EIP is  $P = e^{-gn}$ . Mosquito population density is  $m = \lambda/g$ . Under the assumptions, the formula for VC is  $\mathcal{V} = \lambda S^2 P$ . In the Ross-Macdonald model, the entomological inoculation rate,  $\mathcal{E}$ , is related to VC by a formula:  $\mathcal{E} = \mathcal{V}\kappa/(1 + S\kappa) \approx \mathcal{V}\kappa$ , where  $\kappa$  is the proportion of bites on humans that infects a mosquito; the approximation holds when  $\kappa$  is small, such that mosquito super-infection is rare. In MBITES, the same quantity can be computed directly by Monte Carlo simulation.

|                   | $\Psi_{X,Y}$                                  | $T_{X,Y}$                                                                                                 |
|-------------------|-----------------------------------------------|-----------------------------------------------------------------------------------------------------------|
| $L \rightarrow O$ | $\frac{P_{L,O}}{1-P_{L,L}}$                   | $\frac{T_L}{1-P_{L,L}}$                                                                                   |
| $O \rightarrow F$ | $\frac{P_{O,F}}{1-P_{O,O}-P_{O,L}\Psi_{L,O}}$ | $\frac{T_O+P_{O,L}\Psi_{L,O}T_{L,O}}{1-P_{O,O}-P_{O,L}\Psi_{L,O}}$                                        |
| $O \rightarrow B$ | $\frac{P_{O,B}}{1-P_{O,O}-P_{O,L}\Psi_{L,O}}$ | $\frac{T_O+P_{O,L}\Psi_{L,O}T_{L,O}}{1-P_{O,O}-P_{O,L}\Psi_{L,O}}$                                        |
| $F \rightarrow B$ | $\frac{P_{F,B}}{1-P_{F,F}}$                   | $\frac{T_F}{1-P_{F,F}}$                                                                                   |
| $B \rightarrow R$ | $\frac{P_{B,R}}{1-P_{B,B}-P_{B,F}\Psi_{B,F}}$ | $\frac{T_B+P_{B,F}\Psi_{B,F}T_{F,B}}{1-P_{B,B}-P_{B,F}\Psi_{B,F}}$                                        |
| $F \rightarrow R$ | $\Psi_{F,B}\Psi_{B,R}$                        | $T_{F,B} + T_{B,R}$                                                                                       |
| $O \rightarrow R$ | $\Psi_{O,F}\Psi_{F,R} + \Psi_{O,B}\Psi_{B,R}$ | $\frac{P_{O,F}}{P_{O,F}+P_{O,B}}(T_{O,F} + T_{F,R}) + \frac{P_{O,B}}{P_{O,F}+P_{O,B}}(T_{O,B} + T_{B,R})$ |
| $L \rightarrow R$ | $\Psi_{L,O}\Psi_{O,R}$                        | $T_{L,O} + T_{O,R}$                                                                                       |
| $R \rightarrow R$ | $\sum_{X \neq R} P_{R,X}\Psi_{X,R}$           | $T_R + \sum_{X \neq R} P_{R,X}T_{X,R}$                                                                    |

**Table 2.** In MBITES, it is possible to compute the expected state transitions and waiting times from any state to the next state. In MBDETES and limiting cases of MBITES, these single-state transition expectations can be used to estimate the state transition probabilities and waiting times from one state to every other state, including the length of a gonotrophic cycle, from resting to resting (*i.e.*, from  $R \rightarrow R$ ). The table gives formulas for the probability of surviving to reach the behavioral state  $Y$  starting from another state  $X$ ,  $\Psi_{X,Y}$ , where  $X, Y \in \{L, O, F, B, R\}$ . Note that  $P_{X,Y}$  denotes the single activity bout probability of a state transition. It also gives the expected waiting time to  $Y$  from  $X$  is  $T_{X,Y}$ . These formulae are expressed in terms of the single bout state transitions and waiting times,  $P_{X,Y}$  and  $T_X = \gamma_X^{-1}$  (or they can be by making a simple substitution from one of the formulas appearing in the table above it.)
